# Supplementary material for: Time to harmonize national ambient air quality standards
Source: PubMed Central journal article supplement (PMC5397445; doi:10.1007/s00038-017-0952-y), 2017-02-27

# Time to harmonize national ambient air quality standards for global health equity

Meltem Kutlar Joss 1,2, Marloes Eeftens 1,2, Emily Gintowt 1,2, Ron Kappeler 1,2, Nino Künzli 1,2

## *Affiliations:*

1 Swiss Tropical and Public Health Institute, Basel, Switzerland

2 University of Basel, Basel, Switzerland

Corresponding author:

Meltem Kutlar Joss, email: meltem.kutlar@unibas.ch, Tel. +41 61 284 88 20

## **Table of Contents**

Online Resource 1. Existing Ambient Air Quality Standards (AQS) by WHO Regions in countries recognized by the United Nations and current WHO Air Quality Guidelines for classical air pollutants (PM2.5, PM10, O3, NO2, SO2 and CO)

Online Resource 2. References to Online Resource 1.

Online Resource 3. World map of national air quality standards for annual mean concentration of PM2.5 in relation to WHO air quality guideline values (WHO-AQG) and interim targets.

Online Resource 4. World map of national air quality standards for annual mean concentration of SO2 in relation to WHO air quality guideline values (WHO-AQG) and interim targets.

Online Resource 5. World map of national air quality standards for daily mean concentration of PM10 in relation to WHO air quality guideline values (WHO-AQG) and interim targets.

Online Resource 7. World map of national air quality standards for daily mean concentration of SO2 in relation to WHO air quality guideline values (WHO-AQG) and interim targets.

Online Resource 7. World map of national air quality standards for daily mean concentration of SO2 in relation to WHO air quality guideline values (WHO-AQG) and interim targets.

Online Resource 8. World map of national air quality standards for 1-hour average concentration of NO2 in relation to WHO air quality guideline values (WHO-AQG) and interim targets.

Online Resource 9. World map of national air quality standards for 8-hour maximum concentration of Ozone in relation to WHO air quality guideline values (WHO-AQG) and interim targets.

Online Resource 10. World map of national air quality standards for 8-hour average concentration of CO in relation to WHO air quality guideline values (WHO-AQG) and interim targets.

Online Resource 11. World map of national air quality standards for 1-hour average concentration of CO in relation to WHO air quality guideline values (WHO-AQG) and interim targets.

Online Resource 12. Existing long-term ambient air quality standards for Particulate Matter by WHO Regions in countries recognized by the United Nations and actual annual mean measurement data from the WHO Global Urban Ambient Air Pollution Database.

Online Resource 13. Comparison of national annual air quality standard set for PM10 to measured annual mean concentrations for the year 2013.

Online Resource 14. Comparison of national annual air quality standard set for PM10 to highest measurement of annual concentration of PM10 in 2013.

## Time to harmonize national ambient air quality standards for global health equity

Meltem Kutlar Joss 1,2, Marloes Eeftens 1,2, Emily Gintowt 1,2, Ron Kappeler 1,2, Nino Künzli 1,2

### Affiliations:

1 Swiss Tropical and Public Health Institute, Basel, Switzerland

2 University of Basel, Basel, Switzerland

Corresponding author:

Meltem Kutlar Joss, email: meltem.kutlar@unibas.ch, Tel. +41 61 284 88 20

### Online Resource 1. Existing Ambient Air quality Standards (AAQs) by WHO Regions in countries recognized by the United Nations and current WHO Air Quality Guidelines for classical air pollutants (PM2.5, PM10, O3, NO2, SO2 and CO)

|                                | Particulate matter <2.5 um (PM2.5)<br>µg/m3 |              |                  |                                 | Particulate matter < 10 um (PM10)<br>µg/m3 |             |            |                                 |
|--------------------------------|---------------------------------------------|--------------|------------------|---------------------------------|--------------------------------------------|-------------|------------|---------------------------------|
|                                | PM2.5 24 hours                              | PM2.5 1 year | PM2.5 other      | year set, revised, or published | PM10 24 hours                              | PM10 1 year | PM10 other | year set, revised, or published |
| <b>WHO AQGs</b>                | 25                                          | 10           |                  | 2006                            | 50                                         | 20          |            | 2006                            |
| <b>WHO REGIONS AQGs</b>        |                                             |              |                  |                                 |                                            |             |            |                                 |
| <b>European Region</b>         |                                             |              |                  |                                 |                                            |             |            |                                 |
| <b>EU Directive 2008/50/EC</b> | N/A                                         | 25           |                  | 2008                            | 50                                         | 40          |            | 2008                            |
| <i>Austria</i>                 | other                                       | 25           |                  | 2015                            | 50                                         | 40          |            | 2010                            |
| <i>Belgium</i>                 | other                                       | 25           |                  | !                               | 50                                         | 40          |            | !                               |
| <i>Bulgaria</i>                | N/A                                         | N/A          |                  | 2011                            | N/A                                        | N/A         |            | 2011                            |
| <i>Croatia</i>                 | other                                       | 25           |                  | 2010/2014                       | 50                                         | 40          |            | 2010/2014                       |
| <i>Cyprus</i>                  | other                                       | 25           |                  |                                 | 50                                         | 40          |            |                                 |
| <i>Czech Republic</i>          | other                                       | 25           |                  |                                 | 50                                         | 40          |            |                                 |
| <i>Denmark</i>                 | other                                       | other        |                  | 2010                            | 50                                         | 40          |            | 2010                            |
| <i>Estonia</i>                 | other                                       | 25           |                  |                                 | 50                                         | 40          |            |                                 |
| <i>Finland</i>                 | other                                       | 25           |                  | 2011                            | 50                                         | 40          |            | 2011                            |
| <i>France</i>                  | other                                       | other        |                  | 2012                            | 50                                         | 40          |            | 2012                            |
| <i>Germany</i>                 | other                                       | other        |                  | 2002                            | 50                                         | 40          |            | 2002                            |
| <i>Greece</i>                  | other                                       | 25           |                  |                                 | 50                                         | 40          |            |                                 |
| <i>Hungary</i>                 | other                                       | 25           |                  |                                 | 50                                         | 40          |            |                                 |
| <i>Ireland</i>                 | other                                       | other        |                  | 2011                            | 50                                         | 40          |            | 2011                            |
| <i>Italy</i>                   | other                                       | 25           |                  | 2010                            | 50                                         | 40          |            | 2010                            |
| <i>Latvia</i>                  | other                                       | 25           |                  | 2007                            | 50                                         | 40          |            | 2007                            |
| <i>Lithuania</i>               | other                                       | 25           |                  | 2015                            | 50                                         | 40          |            | 2005                            |
| <i>Luxemburg</i>               | other                                       | 25           |                  | 2011                            | 50                                         | 40          |            | 2011                            |
| <i>Malta</i>                   | other                                       | 25           |                  | 2015                            | 50                                         | 40          |            | 2015                            |
| <i>The Netherlands</i>         | other                                       | 25           |                  | <2006                           | 50                                         | 40          |            | <2006                           |
| <i>Poland</i>                  | other                                       | 25           |                  | 2012                            | 50                                         | 40          |            | 2012                            |
| <i>Portugal</i>                | other                                       | 25           |                  |                                 | 50                                         | 40          |            |                                 |
| <i>Romania</i>                 | other                                       | 25           |                  |                                 | 50                                         | 40          |            |                                 |
| <i>Slovakia</i>                | other                                       | 25           |                  |                                 | 50                                         | 40          |            |                                 |
| <i>Slovenia</i>                | other                                       | 25           |                  |                                 | 50                                         | 40          |            |                                 |
| <i>Spain</i>                   | other                                       | 25           |                  | 2011                            | 50                                         | 40          |            | 2011                            |
| <i>Sweden</i>                  | other                                       | 20           |                  | 2015                            | 50                                         | 40          |            | 2010                            |
| <i>United Kingdom</i>          | other                                       | 25           | Scotland 12 (1y) | 2010                            | 50                                         | 40          |            | 2010                            |

|                                       | Particulate matter <2.5 um (PM2.5)<br>µg/m3 |              |                                   |                                 | Particulate matter < 10 um (PM10)<br>µg/m3 |             |                                   |                                 |
|---------------------------------------|---------------------------------------------|--------------|-----------------------------------|---------------------------------|--------------------------------------------|-------------|-----------------------------------|---------------------------------|
|                                       | PM2.5 24 hours                              | PM2.5 1 year | PM2.5 other                       | year set, revised, or published | PM10 24 hours                              | PM10 1 year | PM10 other                        | year set, revised, or published |
| Albania                               | other                                       | other        |                                   | 2003                            | 150                                        | 50          |                                   | 2003                            |
| Andorra                               | other                                       | 25           |                                   | 2009                            | 50                                         | 40          |                                   | 2009                            |
| Armenia                               | 35                                          | other        | Dust MPC 0.15mg/m3 =1y?           | 2006                            | 60                                         | other       | Dust MPC 0.15mg/m3 =1y?           | 2006                            |
| Azerbaijan                            | other                                       | N/A          | TSP 150 MAC 24h                   | 2011                            | other                                      | N/A         | TSP 150 MAC 24h                   | 2011                            |
| Belarus                               | 25                                          | 15           |                                   | 2010                            | 50                                         | 40          |                                   | 2010                            |
| Bosnia and Herzegovina                | other                                       | other        | 25 (1y) starting2021              | 2012                            | 50                                         | 40          |                                   | 2012                            |
| Georgia                               | N/A                                         | other        | TSP MAC 150 (1y)                  | 2001                            | N/A                                        | other       | TSP MAC 150 (1y)                  | 2001                            |
| Iceland                               | other                                       | other        |                                   | 2010                            | 50                                         | 20          |                                   | 2010                            |
| Israel                                | 37.5                                        | 25           |                                   | 2014                            | 130                                        | 50          |                                   | 2014                            |
| Kazakhstan                            | 35                                          | N/A          |                                   | 2012                            | 60                                         | N/A         |                                   | 2012                            |
| Kyrgyzstan                            | other                                       | N/A          | PM 24h 150                        | !                               | other                                      | N/A         | PM 24h 150                        | !                               |
| Monaco                                |                                             |              |                                   |                                 |                                            |             |                                   |                                 |
| Montenegro                            | 25                                          | 20           |                                   | 2015                            | 50                                         | 40          |                                   | 2015                            |
| Norway                                | other                                       | 15           |                                   | 2007                            | 50                                         | 25          |                                   | 2007                            |
| Republic of Moldova                   | N/A                                         | N/A          |                                   |                                 | N/A                                        | N/A         |                                   |                                 |
| Russian Federation                    | 35                                          | 25           | MAC 160                           | !                               | 60                                         | 40          | MAC 300                           | !                               |
| San Marino                            | N/A                                         | N/A          |                                   | 2012                            | N/A                                        | N/A         |                                   | 2012                            |
| Serbia                                | other                                       | 25           |                                   | 2009                            | 50                                         | 40          |                                   | 2009                            |
| Switzerland                           | other                                       | other        | PM2.5 (1y) under development      | 2015                            | 50                                         | 20          |                                   | 2015                            |
| Tajikistan                            | other                                       | other        | TSP MAC 150                       | 2010                            | other                                      | other       | TSP MAC 150                       | 2010                            |
| Former Yugoslav Republic of Macedonia | other                                       | other        |                                   | 2011                            | 50                                         | 40          |                                   | 2011                            |
| Turkey                                | other                                       | other        |                                   | 2008                            | 100                                        | 60          |                                   | 2008                            |
| Turkmenistan                          | other                                       | N/A          | TSP 150 (24h) MAC 500             | 1996                            | other                                      | N/A         | TSP 150 (24h) MAC 500             | 1996                            |
| Ukraine                               | N/A                                         | other        | MAC 150 PM (1y)                   | 2001                            | N/A                                        | other       | MAC 150 PM (1y)                   | 2001                            |
| Uzbekistan                            | other                                       | other        |                                   | 2010                            | 300                                        | 50          |                                   | 2010                            |
| <b>Region of the Americas</b>         |                                             |              |                                   |                                 |                                            |             |                                   |                                 |
| Antigua and Barbuda                   | N/A                                         | N/A          |                                   |                                 | N/A                                        | N/A         |                                   |                                 |
| Argentina                             | other                                       | other        | en suspension 150 ug/m3 (1 Month) | 2013                            | other                                      | other       | en suspension 150 ug/m3 (1 Month) | 2013                            |
| Bahamas                               | other                                       | other        |                                   |                                 | 50                                         | 40          |                                   |                                 |
| Barbados                              | N/A                                         | N/A          |                                   | 2000                            | N/A                                        | N/A         |                                   | 2000                            |
| Belize                                | N/A                                         | N/A          | only emission limits              | 2003                            | N/A                                        | N/A         |                                   | 2003                            |
| Bolivia (Plurinational State of)      | other                                       | other        | city region with different AQS    | 2013                            | 150                                        | 50          | city region with different values | 2013                            |
| Brazil                                | other                                       | other        |                                   | 2013                            | 150                                        | 50          |                                   | 2013                            |
| Canada                                | 28                                          | 10           |                                   | 2015                            | other                                      | other       | city region with different values | 2015                            |
| Chile                                 | 50                                          | 20           |                                   | 2013                            | 150                                        | 50          |                                   | 2013                            |
| Colombia                              | 50                                          | 25           |                                   | 2013                            | 150                                        | 50          |                                   | 2013                            |
| Costa Rica                            | other                                       | other        |                                   | 2013                            | 150                                        | 50          |                                   | 2013                            |
| Cuba                                  | N/A                                         | N/A          |                                   | 2013                            | N/A                                        | N/A         |                                   | 2013                            |
| Dominica                              | N/A                                         | N/A          |                                   | 2013                            | N/A                                        | N/A         |                                   | 2013                            |
| Dominican Republic                    | 65                                          | 15           |                                   | 2003                            | 150                                        | 50          |                                   | 2003                            |
| Ecuador                               | 65                                          | 15           |                                   | 2013                            | 150                                        | 50          |                                   | 2013                            |
| El Salvador                           | 65                                          | 15           |                                   | 2013                            | 150                                        | 50          |                                   | 2013                            |
| Grenada                               |                                             |              |                                   |                                 |                                            |             |                                   |                                 |
| Guatemala                             | N/A                                         | N/A          |                                   |                                 | N/A                                        | N/A         |                                   |                                 |
| Guyana                                | N/A                                         | N/A          |                                   | 2000                            | N/A                                        | N/A         |                                   | 2000                            |
| Haiti                                 | N/A                                         | N/A          |                                   |                                 | N/A                                        | N/A         |                                   |                                 |
| Honduras                              | N/A                                         | N/A          |                                   |                                 | N/A                                        | N/A         |                                   |                                 |

|                                    | Particulate matter <2.5 um (PM2.5)<br>µg/m3 |                 |                                       |                                       | Particulate matter < 10 um (PM10)<br>µg/m3 |                |                                      |                                       |
|------------------------------------|---------------------------------------------|-----------------|---------------------------------------|---------------------------------------|--------------------------------------------|----------------|--------------------------------------|---------------------------------------|
|                                    | PM2.5 24<br>hours                           | PM2.5 1<br>year | PM2.5 other                           | year set,<br>revised, or<br>published | PM10 24<br>hours                           | PM10 1<br>year | PM10 other                           | year set,<br>revised, or<br>published |
| Jamaica                            | other                                       | other           |                                       | 2013                                  | 150                                        | 50             |                                      | 2013                                  |
| Mexico                             | 45                                          | 12              |                                       | 2014                                  | 75                                         | 40             |                                      | 2014                                  |
| Nicaragua                          | other                                       | other           |                                       | 2013                                  | 150                                        | 50             |                                      | 2013                                  |
| Panama                             | other                                       | other           |                                       | 2013                                  | 150                                        | 50             |                                      | 2013                                  |
| Paraguay                           | 30                                          | 15              |                                       | 2015                                  | 150                                        | other          |                                      | 2015                                  |
| Peru                               | 25                                          | other           |                                       | 2013                                  | 150                                        | 50             |                                      | 2013                                  |
| Saint Kitts and Nevis              | N/A                                         | N/A             |                                       |                                       | N/A                                        | N/A            |                                      |                                       |
| Saint Lucia                        | N/A                                         | N/A             |                                       | 2005                                  | N/A                                        | N/A            |                                      | 2005                                  |
| Saint Vincent and the Grenadines   |                                             |                 |                                       |                                       |                                            |                |                                      |                                       |
| Suriname                           | N/A                                         | N/A             |                                       |                                       | N/A                                        | N/A            |                                      |                                       |
| Trinidad and Tobago                | 65                                          | 15              |                                       | 2014                                  | 75                                         | 50             |                                      | 2014                                  |
| United States of America           | 35                                          | 12              |                                       | 2016                                  | 150                                        | other          | city region with different AQS       | 2016                                  |
| Uruguay                            | N/A                                         | N/A             |                                       |                                       | N/A                                        | N/A            |                                      |                                       |
| Venezuela (Bolivarian Republic of) | other                                       | other           |                                       | 2013                                  | 150                                        | 50             |                                      | 2013                                  |
| <b>African Region</b>              |                                             |                 |                                       |                                       |                                            |                |                                      |                                       |
| Algeria                            | other                                       | N/A             |                                       | 2006                                  | other                                      | N/A            | fine particles in suspension 80ug/m3 | 2006                                  |
| Angola                             | N/A                                         | N/A             |                                       |                                       | N/A                                        | N/A            |                                      |                                       |
| Benin                              | other                                       | other           |                                       | 2001                                  | 230                                        | 50             |                                      | 2001                                  |
| Botswana                           | other                                       | other           |                                       | 2000                                  | 200                                        | 100            | PM=PM10?                             | 2000                                  |
| Burkina Faso                       | 200                                         | N/A             | PM2.5 200-300 24h                     | 2000                                  | 200                                        | N/A            | PM10 200-300 24h                     | 2000                                  |
| Burundi                            | N/A                                         | N/A             |                                       |                                       | N/A                                        | N/A            |                                      |                                       |
| Cameroon                           | 25                                          | 10              |                                       |                                       | 50                                         | 20             |                                      |                                       |
| Cabo Verde                         |                                             |                 |                                       |                                       |                                            |                |                                      |                                       |
| Central African Republic           | N/A                                         | N/A             |                                       |                                       | N/A                                        | N/A            |                                      |                                       |
| Chad                               | N/A                                         | N/A             |                                       | 2016                                  | N/A                                        | N/A            |                                      | 2016                                  |
| Comoros                            |                                             |                 |                                       |                                       |                                            |                |                                      |                                       |
| Congo                              | N/A                                         | N/A             |                                       |                                       | N/A                                        | N/A            |                                      |                                       |
| Côte d'Ivoire                      | N/A                                         | N/A             |                                       | 2015                                  | N/A                                        | N/A            |                                      | 2015                                  |
| Democratic Republic of the Congo   | N/A                                         | N/A             |                                       |                                       | N/A                                        | N/A            |                                      |                                       |
| Equatorial Guinea                  |                                             |                 |                                       |                                       |                                            |                |                                      |                                       |
| Eritrea                            | N/A                                         | N/A             |                                       |                                       | N/A                                        | N/A            |                                      |                                       |
| Ethiopia                           | N/A                                         | N/A             |                                       |                                       | N/A                                        | N/A            |                                      |                                       |
| Gabon                              | N/A                                         | N/A             |                                       |                                       | N/A                                        | N/A            |                                      |                                       |
| Gambia                             | other                                       | N/A             |                                       |                                       | 50                                         | N/A            |                                      |                                       |
| Ghana                              | other                                       | N/A             |                                       | 2016                                  | 70                                         | N/A            |                                      | 2016                                  |
| Guinea                             | N/A                                         | N/A             |                                       |                                       | N/A                                        | N/A            |                                      |                                       |
| Guinea-Bissau                      |                                             |                 |                                       |                                       |                                            |                |                                      |                                       |
| Kenya                              | 75                                          | 35              | s. none defined for residential areas | 2014                                  | 100                                        | 50             |                                      | 2014                                  |
| Lesotho                            | N/A                                         | N/A             |                                       |                                       | N/A                                        | N/A            |                                      |                                       |
| Liberia                            | N/A                                         | N/A             |                                       |                                       | N/A                                        | N/A            |                                      |                                       |
| Madagascar                         | N/A                                         | N/A             |                                       |                                       | N/A                                        | N/A            |                                      |                                       |
| Malawi                             | other                                       | 8               |                                       | 2005                                  | 25                                         | other          | 500TSP (1y)                          | 2005                                  |
| Mali                               | N/A                                         | N/A             |                                       |                                       | N/A                                        | N/A            |                                      |                                       |
| Mauritania                         |                                             |                 |                                       |                                       |                                            |                |                                      |                                       |
| Mauritius                          | other                                       | other           | TSP 150 (24h) 50 (y)                  | 1998                                  | other                                      | other          | TSP 150 (24h) 50 (y)                 | 1998                                  |
| Mozambique                         | other                                       | N/A             |                                       | 2005                                  | other                                      | N/A            | TSP(24h) 200                         | 2005                                  |
| Namibia                            | N/A                                         | N/A             |                                       |                                       | N/A                                        | N/A            |                                      |                                       |

|                                       | Particulate matter <2.5 um (PM2.5)<br>µg/m3 |                 |             |                                       | Particulate matter < 10 um (PM10)<br>µg/m3 |                |                       |                                       |
|---------------------------------------|---------------------------------------------|-----------------|-------------|---------------------------------------|--------------------------------------------|----------------|-----------------------|---------------------------------------|
|                                       | PM2.5 24<br>hours                           | PM2.5 1<br>year | PM2.5 other | year set,<br>revised, or<br>published | PM10 24<br>hours                           | PM10 1<br>year | PM10 other            | year set,<br>revised, or<br>published |
| Niger                                 |                                             |                 |             |                                       |                                            |                |                       |                                       |
| Nigeria                               | N/A                                         | N/A             |             |                                       | N/A                                        | N/A            |                       |                                       |
| Rwanda                                | other                                       | other           |             | 2014                                  | 100                                        | 50             | TSP 140 (1y) 200(24h) | 2014                                  |
| Sao Tome and Principe                 |                                             |                 |             |                                       |                                            |                |                       |                                       |
| Senegal                               | other                                       | other           |             | 2003                                  | 260                                        | 80             |                       | 2003                                  |
| Seychelles                            | N/A                                         | N/A             |             |                                       | N/A                                        | N/A            |                       |                                       |
| Sierra Leone                          |                                             |                 |             |                                       |                                            |                |                       |                                       |
| South Africa                          | 65                                          | 25              |             | 2009                                  | 120                                        | 50             |                       | 2009                                  |
| South Sudan                           |                                             |                 |             |                                       |                                            |                |                       |                                       |
| Swaziland                             | other                                       | N/A             |             | 2012                                  | 50                                         | N/A            |                       | 2012                                  |
| Togo                                  | N/A                                         | N/A             |             |                                       | N/A                                        | N/A            |                       |                                       |
| Uganda                                | N/A                                         | N/A             |             |                                       | N/A                                        | N/A            |                       |                                       |
| United Republic of Tanzania           | other                                       | other           |             | 2007                                  | other                                      | 60             | 0.1 ug/Nm3 (daily)    | 2007                                  |
| Zambia                                | other                                       | N/A             |             | 1996                                  | 70                                         | N/A            |                       | 1996                                  |
| Zimbabwe                              | N/A                                         | N/A             |             |                                       | N/A                                        | N/A            |                       |                                       |
| <b>Eastern Mediterranean Region</b>   |                                             |                 |             |                                       |                                            |                |                       |                                       |
| Afghanistan                           | 25                                          | 10              |             | 2010                                  | 50                                         | 20             |                       | 2010                                  |
| Bahrain                               |                                             |                 |             |                                       |                                            |                |                       |                                       |
| Djibouti                              |                                             |                 |             |                                       |                                            |                |                       |                                       |
| Egypt                                 | other                                       | N/A             |             | 1994                                  | 70                                         | N/A            |                       | 1994                                  |
| Iran (Islamic Republic of)            | 25                                          | 10              |             | 2011                                  | 50                                         | 20             |                       | 2011                                  |
| Iraq                                  | N/A                                         | N/A             |             |                                       | N/A                                        | N/A            |                       |                                       |
| Jordan                                | 65                                          | 15              |             | !                                     | 120                                        | 70             | TSP 75 (1y) 260 (24h) | !                                     |
| Kuwait                                | 35                                          | 15              |             | !                                     | 150                                        | 90             |                       | !                                     |
| Lebanon                               | other                                       | N/A             |             | !                                     | 80                                         | N/A            | TSP 120 (24h)         | !                                     |
| Libya                                 |                                             |                 |             |                                       |                                            |                |                       |                                       |
| Morocco                               | other                                       | N/A             |             | 2009                                  | 50                                         | N/A            |                       | 2009                                  |
| Oman                                  |                                             |                 |             |                                       |                                            |                |                       |                                       |
| Pakistan                              | 35                                          | 15              | 15 (1h)     | 2010                                  | 150                                        | 120            |                       | 2010                                  |
| Qatar                                 |                                             |                 |             |                                       |                                            |                |                       |                                       |
| Saudi Arabia                          | 35                                          | 15              |             | !                                     | 340                                        | 80             |                       | !                                     |
| Somalia                               |                                             |                 |             |                                       |                                            |                |                       |                                       |
| Sudan                                 |                                             |                 |             |                                       |                                            |                |                       |                                       |
| Syrian Arab Republic                  | other                                       | N/A             |             | 2011                                  | 70                                         | N/A            |                       | 2011                                  |
| Tunisia                               | N/A                                         | N/A             |             | <2009                                 | N/A                                        | N/A            | TSP 550 (24h)         | <2009                                 |
| United Arab Emirates                  |                                             |                 |             |                                       |                                            |                |                       |                                       |
| Yemen                                 |                                             |                 |             |                                       |                                            |                |                       |                                       |
| <b>South-East Asia</b>                |                                             |                 |             |                                       |                                            |                |                       |                                       |
| Bangladesh                            | 65                                          | 15              |             | 2005                                  | 150                                        | 50             |                       | 2005                                  |
| Bhutan                                | other                                       | other           |             |                                       | 100                                        | 60             |                       |                                       |
| Democratic People's Republic of Korea |                                             |                 |             |                                       |                                            |                |                       |                                       |
| India                                 | 60                                          | 40              |             | 2009                                  | 100                                        | 60             |                       | 2009                                  |
| Indonesia                             | other                                       | N/A             |             | 2010                                  | 150                                        | N/A            |                       | 2010                                  |
| Maldives                              | N/A                                         | N/A             |             |                                       | N/A                                        | N/A            |                       |                                       |
| Myanmar                               | N/A                                         | N/A             |             |                                       | N/A                                        | N/A            |                       | 2014                                  |
| Nepal                                 | other                                       | N/A             |             | 2003                                  | 120                                        | N/A            |                       | 2003                                  |
| Sri Lanka                             | 50                                          | 25              |             | 2008                                  | 100                                        | 50             |                       | 2008                                  |

|                                  | Particulate matter <2.5 um (PM2.5)<br>µg/m3 |                 |                                   |                                       | Particulate matter < 10 um (PM10)<br>µg/m3 |                |                                   |                                       |
|----------------------------------|---------------------------------------------|-----------------|-----------------------------------|---------------------------------------|--------------------------------------------|----------------|-----------------------------------|---------------------------------------|
|                                  | PM2.5 24<br>hours                           | PM2.5 1<br>year | PM2.5 other                       | year set,<br>revised, or<br>published | PM10 24<br>hours                           | PM10 1<br>year | PM10 other                        | year set,<br>revised, or<br>published |
| Thailand                         | 50                                          | 25              |                                   | 2010                                  | 120                                        | 50             |                                   | 2010                                  |
| Timor-Leste                      | N/A                                         | N/A             |                                   |                                       | N/A                                        | N/A            |                                   |                                       |
| <b>Western pacific</b>           |                                             |                 |                                   |                                       |                                            |                |                                   |                                       |
| Australia                        | 25                                          | 8               |                                   | 2008                                  | 50                                         | other          |                                   | 2008                                  |
| Brunei Darussalam                | N/A                                         | N/A             |                                   |                                       | N/A                                        | N/A            |                                   |                                       |
| Cambodia                         | N/A                                         | N/A             |                                   | 2000                                  | N/A                                        | N/A            |                                   | 2000                                  |
| China                            | 75                                          | 35              | city region with different values | 2014                                  | 150                                        | 50             | city region with different values | 2014                                  |
| Cook Islands                     |                                             |                 |                                   |                                       |                                            |                |                                   |                                       |
| Fiji                             | other                                       | other           |                                   |                                       | 50                                         | 20             |                                   |                                       |
| Japan                            | 35                                          | 15              |                                   | !                                     | 100                                        | other          |                                   | !                                     |
| Kiribati                         | N/A                                         | N/A             |                                   |                                       | N/A                                        | N/A            |                                   |                                       |
| Lao People's Democratic Republic | N/A                                         | N/A             |                                   |                                       | N/A                                        | N/A            |                                   |                                       |
| Malaysia                         | 75                                          | 35              |                                   | 2015                                  | 150                                        | 50             |                                   | 2015                                  |
| Marshall Islands                 | N/A                                         | N/A             |                                   |                                       | N/A                                        | N/A            |                                   |                                       |
| Micronesia (Federated States of) | N/A                                         | N/A             |                                   |                                       | N/A                                        | N/A            |                                   |                                       |
| Mongolia                         | 50                                          | 25              |                                   | 2007                                  | 100                                        | 50             |                                   | 2007                                  |
| Nauru                            | N/A                                         | N/A             |                                   |                                       | N/A                                        | N/A            |                                   |                                       |
| New Zealand                      | other                                       | N/A             |                                   | 2011                                  | 50                                         | N/A            |                                   | 2011                                  |
| Niue                             | N/A                                         | N/A             |                                   |                                       | N/A                                        | N/A            |                                   |                                       |
| Palau                            | N/A                                         | N/A             |                                   |                                       | N/A                                        | N/A            |                                   |                                       |
| Papua New Guinea                 | N/A                                         | N/A             |                                   | 2010                                  | N/A                                        | N/A            |                                   | 2010                                  |
| Philippines                      | other                                       | other           |                                   | 2014                                  | 150                                        | 60             | TSP 90(Y) TSP 230 (24h)           | 2014                                  |
| Republic of Korea                | 50                                          | 25              |                                   | 2013                                  | 100                                        | 50             |                                   | 2013                                  |
| Samoa                            | N/A                                         | N/A             |                                   |                                       | N/A                                        | N/A            |                                   |                                       |
| Singapore                        | 25                                          | 15              | lower targets by 2020             | 2014                                  | 150                                        | other          | lower targets by 2020             | 2014                                  |
| Solomon Islands                  | N/A                                         | N/A             |                                   |                                       | N/A                                        | N/A            |                                   |                                       |
| Tonga                            | N/A                                         | N/A             |                                   | 2015                                  | N/A                                        | N/A            |                                   | 2015                                  |
| Tuvalu                           | N/A                                         | N/A             |                                   |                                       | N/A                                        | N/A            |                                   |                                       |
| Vanuatu (Palestine)              |                                             |                 |                                   |                                       |                                            |                |                                   |                                       |
| Viet Nam                         | 50                                          | 25              |                                   | 2013                                  | 150                                        | 50             |                                   | 2013                                  |
| <b>OTHER</b>                     |                                             |                 |                                   |                                       |                                            |                |                                   |                                       |
| Gibraltar                        | N/A                                         | 25              |                                   | 2010                                  | 50                                         | 40             |                                   | 2010                                  |
| St Helena                        | N/A                                         | N/A             |                                   | 2012                                  | N/A                                        | N/A            |                                   | 2012                                  |
| Liechtenstein                    | other                                       | other           |                                   | 2008                                  | 50                                         | 20             |                                   | 2008                                  |
| Taiwan                           | 35                                          | 15              |                                   | 2016                                  | 125                                        | 65             |                                   | 2012                                  |

|                                | Ozone (O3)<br>µg/m3 |                      |                              |                                       | Nitrogen dioxide (NO2)<br>µg/m3 |                 |               |               |                                       |
|--------------------------------|---------------------|----------------------|------------------------------|---------------------------------------|---------------------------------|-----------------|---------------|---------------|---------------------------------------|
|                                | O3 1 hour           | O3 8-hr<br>daily max | other                        | year set,<br>revised, or<br>published | NO2 1-h                         | NO2 24<br>hours | NO2 1<br>year | NO2 other     | year set,<br>revised, or<br>published |
| <b>WHO AQGs</b>                |                     | 100                  |                              | 2006                                  | 200                             |                 | 40            |               | 2006                                  |
| <b>WHO REGIONS AQGs</b>        |                     |                      |                              |                                       |                                 |                 |               |               |                                       |
| <b>European Region</b>         |                     |                      |                              |                                       |                                 |                 |               |               |                                       |
| <b>EU Directive 2008/50/EC</b> | N/A                 | 120                  |                              | 2008                                  | 200                             | other           | 40            |               | 2008                                  |
| <i>Austria</i>                 | other               | other                | Target value 8hmax 120       | 2010                                  | 200                             | other           | 30            | 24h target 80 | 2012                                  |
| <i>Belgium</i>                 | other               | 120                  |                              | !                                     | 200                             | other           | 40            |               | !                                     |
| <i>Bulgaria</i>                | N/A                 | N/A                  |                              | 2011                                  | N/A                             | N/A             | N/A           |               | 2011                                  |
| <i>Croatia</i>                 | other               | 120                  | 180 (1h) info threshold      | 2010/2014                             | 200                             | other           | 40            | Nox 30        | 2010/2014                             |
| <i>Cyprus</i>                  | other               | 120                  |                              |                                       | 200                             | other           | 40            |               |                                       |
| <i>Czech Republic</i>          | other               | 120                  |                              |                                       | 200                             | other           | 40            |               |                                       |
| <i>Denmark</i>                 | other               | 120                  |                              | 2010                                  | 200                             | other           | 40            |               | 2010                                  |
| <i>Estonia</i>                 | other               | 120                  |                              |                                       | 200                             | other           | 40            |               |                                       |
| <i>Finland</i>                 | other               | 120                  |                              | 2011                                  | 200                             | other           | 40            |               | 2011                                  |
| <i>France</i>                  | other               | 120                  |                              | 2012                                  | 200                             | other           | 40            | Nox 30(Y)     | 2012                                  |
| <i>Germany</i>                 | N/A                 | N/A                  |                              | 2002                                  | 200                             | other           | 40            | Nox 30 (y)    | 2002                                  |
| <i>Greece</i>                  | other               | 120                  |                              |                                       | 200                             | other           | 40            |               |                                       |
| <i>Hungary</i>                 | other               | 120                  |                              |                                       | 200                             | other           | 40            |               |                                       |
| <i>Ireland</i>                 | other               | other                | 0 (1h) information threshold | 2011                                  | 200                             | other           | 40            | NOx 30 (1y)   | 2011                                  |
| <i>Italy</i>                   | N/A                 | N/A                  |                              | 2010                                  | 200                             | other           | 40            | NOx 30 (1y)   | 2010                                  |
| <i>Latvia</i>                  | other               | 120                  |                              |                                       | 200                             | other           | 40            |               |                                       |
| <i>Lithuania</i>               | other               | 120                  |                              | 2010                                  | 200                             | other           | 40            | NOx 30 (1y)   | 2010                                  |
| <i>Luxemburg</i>               | other               | 120                  |                              | 2011                                  | 200                             | other           | 40            |               | 2011                                  |
| <i>Malta</i>                   | other               | 120                  |                              | 2015                                  | 200                             | other           | 40            |               | 2015                                  |
| <i>The Netherlands</i>         | other               | 120                  |                              | <2006                                 | 200                             | other           | 40            |               | <2006                                 |
| <i>Poland</i>                  | other               | other                | alert value 120 (8h)         | 2012                                  | 200                             | other           | 40            |               | 2012                                  |
| <i>Portugal</i>                | other               | 120                  |                              |                                       | 200                             | other           | 40            |               |                                       |
| <i>Romania</i>                 | other               | 120                  |                              |                                       | 200                             | other           | 40            |               |                                       |
| <i>Slovakia</i>                | other               | 120                  |                              |                                       | 200                             | other           | 40            |               |                                       |
| <i>Slovenia</i>                | other               | 120                  |                              |                                       | 200                             | other           | 40            | Nox 30        |                                       |
| <i>Spain</i>                   | other               | 120                  |                              | 2011                                  | 200                             | other           | 40            |               | 2011                                  |
| <i>Sweden</i>                  | other               | 120                  | 180 information threshold    | 2010                                  | 90                              | 60              | 40            |               | 2010                                  |
| <i>United Kingdom</i>          | other               | 100                  |                              | 2010                                  | 200                             | other           | 40            | Nox 30 (y)    | 2010                                  |

|                                       | Ozone (O3)<br>µg/m3 |                      |                               |                                       | Nitrogen dioxide (NO2)<br>µg/m3 |                 |               |                            |                                       |
|---------------------------------------|---------------------|----------------------|-------------------------------|---------------------------------------|---------------------------------|-----------------|---------------|----------------------------|---------------------------------------|
|                                       | O3 1 hour           | O3 8-hr<br>daily max | other                         | year set,<br>revised, or<br>published | NO2 1-h                         | NO2 24<br>hours | NO2 1<br>year | NO2 other                  | year set,<br>revised, or<br>published |
| Albania                               | N/A                 | N/A                  | 65 (1y)                       | 2003                                  | 250                             | other           | 40            | 4hmax 95                   | 2003                                  |
| Andorra                               | other               | 120                  |                               | 2009                                  | 200                             | other           | 40            | NOx 30 (annual)            | 2009                                  |
| Armenia                               | N/A                 | N/A                  |                               | 2006                                  | other                           | other           | other         | time 85 (24h?)MPC 40 (1y?) | 2006                                  |
| Azerbaijan                            | N/A                 | N/A                  |                               | 2011                                  | other                           | 40              | N/A           | NOx MAC40                  | 2011                                  |
| Belarus                               | other               | 120                  |                               | 2010                                  | N/A                             | N/A             | N/A           |                            | 2010                                  |
| Bosnia and Herzegovina                | other               | 120                  |                               | 2012                                  | 200                             | 85              | 40            | Nox 30(1y)                 | 2012                                  |
| Georgia                               | N/A                 | N/A                  |                               | 2001                                  | N/A                             | N/A             | other         | MAC 40 (1y)                | 2001                                  |
| Iceland                               | other               | 120                  |                               | 2003                                  | N/A                             | N/A             | 40            | NOx 30 (annual)            | 2002                                  |
| Israel                                | other               | 140                  |                               | 2014                                  | other                           | 200             | 40            |                            | 2014                                  |
| Kazakhstan                            | N/A                 | N/A                  |                               | 2012                                  | other                           | 40              | N/A           |                            | 2012                                  |
| Kyrgyzstan                            | N/A                 | other                | 30 (24h) MAC 160              | !                                     | other                           | 40              | N/A           | MAC 85                     | !                                     |
| Monaco                                |                     |                      |                               |                                       |                                 |                 |               |                            |                                       |
| Montenegro                            | other               | N/A                  | 180 (1h) info threshold       | 2015                                  | 200                             | other           | 40            |                            | 2015                                  |
| Norway                                | other               | 120                  |                               | 2007                                  | 200                             | other           | N/A           |                            | 2007                                  |
| Republic of Moldova                   | N/A                 | N/A                  |                               |                                       | N/A                             | N/A             | N/A           |                            |                                       |
| Russian Federation                    | other               | other                | 30 24h                        | !                                     | other                           | N/A             | 40            | 85 (20min)                 | !                                     |
| San Marino                            | N/A                 | N/A                  |                               | 2012                                  | N/A                             | N/A             | N/A           |                            | 2012                                  |
| Serbia                                | N/A                 | N/A                  |                               | 2009                                  | 150                             | 85              | 40            |                            | 2009                                  |
| Switzerland                           | 120                 | other                |                               | 2015                                  | other                           | 80              | 30            |                            | 2015                                  |
| Tajikistan                            | N/A                 | N/A                  |                               | 2010                                  | N/A                             | other           | other         | MAC 40                     | 2010                                  |
| Former Yugoslav Republic of Macedonia | other               | 120                  |                               | 2011                                  | 200                             | other           | 40            |                            | 2011                                  |
| Turkey                                | N/A                 | N/A                  |                               | 2008                                  | 300                             | other           | N/A           |                            | 2008                                  |
| Turkmenistan                          | N/A                 | N/A                  |                               | 1996                                  | other                           | 40              | other         | MAC 85                     | 1996                                  |
| Ukraine                               | N/A                 | N/A                  |                               | 2001                                  | N/A                             | other           | other         | MAC40                      | 2001                                  |
| Uzbekistan                            | N/A                 | N/A                  |                               | 2010                                  | other                           | 60              | 40            |                            | 2010                                  |
| <b>Region of the Americas</b>         |                     |                      |                               |                                       |                                 |                 |               |                            |                                       |
| Antigua and Barbuda                   | N/A                 | N/A                  |                               |                                       | N/A                             | N/A             | N/A           |                            |                                       |
| Argentina                             | 196                 | other                | city region with diff. values | 2013                                  | other                           | other           | N/A           | 0.45 ppm NOx (1h)          | 2013                                  |
| Bahamas                               | 200                 | 110                  |                               |                                       | 200                             | N/A             | 40            |                            |                                       |
| Barbados                              | N/A                 | N/A                  |                               | 2000                                  | N/A                             | N/A             | N/A           |                            | 2000                                  |
| Belize                                | N/A                 | N/A                  |                               | 2003                                  | N/A                             | N/A             | N/A           |                            | 2003                                  |
| Bolivia (Plurinational State of)      | 236                 | other                | city region with diff. values | 2013                                  | 400                             | 150             | N/A           | city region with diff. AQS | 2013                                  |
| Brazil                                | 160                 | other                |                               | 2013                                  | 320                             | other           | 100           |                            | 2013                                  |
| Canada                                | N/A                 | 135                  | city region with diff. values | 2015                                  | N/A                             | N/A             | N/A           | city region with diff. AQS | 2013                                  |



|                                    | Ozone (O3)<br>µg/m3 |                      |                            |                                       | Nitrogen dioxide (NO2)<br>µg/m3 |                 |               |                            |                                       |
|------------------------------------|---------------------|----------------------|----------------------------|---------------------------------------|---------------------------------|-----------------|---------------|----------------------------|---------------------------------------|
|                                    | O3 1 hour           | O3 8-hr<br>daily max | other                      | year set,<br>revised, or<br>published | NO2 1-h                         | NO2 24<br>hours | NO2 1<br>year | NO2 other                  | year set,<br>revised, or<br>published |
| Chile                              | N/A                 | 120                  |                            | 2013                                  | 400                             | other           | 100           |                            | 2013                                  |
| Colombia                           | 120                 | 80                   |                            | 2013                                  | 200                             | 150             | 100           |                            | 2013                                  |
| Costa Rica                         | 160                 | other                |                            | 2013                                  | 400                             | other           | 100           |                            | 2013                                  |
| Cuba                               | N/A                 | N/A                  |                            | 2013                                  | N/A                             | N/A             | N/A           |                            | 2013                                  |
| Dominica                           | N/A                 | N/A                  |                            | 2013                                  | N/A                             | N/A             | N/A           |                            | 2013                                  |
| Dominican Republic                 | 235                 | 160                  |                            | 2003                                  | 400                             | 300             | 100           |                            | 2003                                  |
| Ecuador                            | 160                 | 120                  |                            | 2013                                  | other                           | 150             | 100           |                            | 2013                                  |
| El Salvador                        | 235                 | 120                  |                            | 2013                                  | other                           | 150             | 100           |                            | 2013                                  |
| Grenada                            |                     |                      |                            |                                       |                                 |                 |               |                            |                                       |
| Guatemala                          | N/A                 | N/A                  |                            |                                       | N/A                             | N/A             | N/A           |                            |                                       |
| Guyana                             | N/A                 | N/A                  |                            | 2000                                  | N/A                             | N/A             | N/A           |                            | 2000                                  |
| Haiti                              | N/A                 | N/A                  |                            |                                       | N/A                             | N/A             | N/A           |                            |                                       |
| Honduras                           | N/A                 | N/A                  |                            |                                       | N/A                             | N/A             | N/A           |                            |                                       |
| Jamaica                            | 235                 | other                |                            | 2013                                  | 100                             | other           | N/A           |                            | 2013                                  |
| Mexico                             | 216                 | 157                  |                            | 2014                                  | 395                             | other           | 100           |                            | 2014                                  |
| Nicaragua                          | 235                 | 160                  |                            | 2013                                  | 400                             | other           | 100           |                            | 2013                                  |
| Panama                             | 235                 | 157                  |                            | 2013                                  | other                           | 150             | 100           |                            | 2013                                  |
| Paraguay                           | other               | 120                  |                            | 2015                                  | 200                             | other           | 40            |                            | 2015                                  |
| Peru                               | other               | 120                  |                            | 2013                                  | 200                             | other           | 100           |                            | 2013                                  |
| Saint Kitts and Nevis              | N/A                 | N/A                  |                            |                                       | N/A                             | N/A             | N/A           |                            |                                       |
| Saint Lucia                        | N/A                 | N/A                  |                            | 2005                                  | N/A                             | N/A             | N/A           |                            | 2005                                  |
| Saint Vincent and the Grenadines   |                     |                      |                            |                                       |                                 |                 |               |                            |                                       |
| Suriname                           | N/A                 | N/A                  |                            |                                       | N/A                             | N/A             | N/A           |                            |                                       |
| Trinidad and Tobago                | other               | 120                  |                            | 2014                                  | 200                             | other           | 40            |                            | 2014                                  |
| United States of America           | other               | 140                  | city region with diff. AQS | 2016                                  | 188                             | other           | 100           | city region with diff. AQS | 2016                                  |
| Uruguay                            | N/A                 | N/A                  |                            |                                       | N/A                             | N/A             | N/A           |                            |                                       |
| Venezuela (Bolivarian Republic of) | 200                 | 160                  |                            | 2013                                  | 367                             | 300             | 100           |                            | 2013                                  |
| <b>African Region</b>              |                     |                      |                            |                                       |                                 |                 |               |                            |                                       |
| Algeria                            | N/A                 | other                | 200 (?h)                   | 2006                                  | other                           | other           | N/A           | 200 (?h)                   | 2006                                  |
| Angola                             | N/A                 | N/A                  |                            |                                       | N/A                             | N/A             | N/A           |                            |                                       |
| Benin                              | N/A                 | 160                  | =0.08ppm(8h)               | 2001                                  | other                           | 150             | 100           |                            | 2001                                  |
| Botswana                           | 235                 | 157                  |                            | 2000                                  | 400                             | 200             | 100           |                            | 2000                                  |
| Burkina Faso                       | 150                 | 150                  | 0-200 (1h),150-300 8hmax   | 2000                                  | 170                             | other           | N/A           |                            | 2000                                  |
| Burundi                            | N/A                 | N/A                  |                            |                                       | N/A                             | N/A             | N/A           |                            |                                       |

|                                  | Ozone (O3)<br>µg/m3 |                      |                         |                                       | Nitrogen dioxide (NO2)<br>µg/m3 |                 |               |              |                                       |
|----------------------------------|---------------------|----------------------|-------------------------|---------------------------------------|---------------------------------|-----------------|---------------|--------------|---------------------------------------|
|                                  | O3 1 hour           | O3 8-hr<br>daily max | other                   | year set,<br>revised, or<br>published | NO2 1-h                         | NO2 24<br>hours | NO2 1<br>year | NO2 other    | year set,<br>revised, or<br>published |
| Cameroon                         | N/A                 | 100                  |                         |                                       | 200                             | N/A             | 40            |              |                                       |
| Cabo Verde                       |                     |                      |                         |                                       |                                 |                 |               |              |                                       |
| Central African Republic         | N/A                 | N/A                  |                         |                                       | N/A                             | N/A             | N/A           |              |                                       |
| Chad                             | N/A                 | N/A                  |                         | 2016                                  | N/A                             | N/A             | N/A           |              | 2016                                  |
| Comoros                          |                     |                      |                         |                                       |                                 |                 |               |              |                                       |
| Congo                            | N/A                 | N/A                  |                         |                                       | N/A                             | N/A             | N/A           |              |                                       |
| Côte d'Ivoire                    | N/A                 | N/A                  |                         | 2015                                  | N/A                             | N/A             | N/A           |              | 2015                                  |
| Democratic Republic of the Congo | N/A                 | N/A                  |                         |                                       | N/A                             | N/A             | N/A           |              |                                       |
| Equatorial Guinea                |                     |                      |                         |                                       |                                 |                 |               |              |                                       |
| Eritrea                          | N/A                 | N/A                  |                         |                                       | N/A                             | N/A             | N/A           |              |                                       |
| Ethiopia                         | N/A                 | N/A                  |                         |                                       | N/A                             | N/A             | N/A           |              |                                       |
| Gabon                            | N/A                 | N/A                  |                         |                                       | N/A                             | N/A             | N/A           |              |                                       |
| Gambia                           | N/A                 | N/A                  |                         |                                       | N/A                             | N/A             | 40            |              |                                       |
| Ghana                            | N/A                 | N/A                  |                         | 2016                                  | 200                             | 60              | N/A           |              | 2016                                  |
| Guinea                           | N/A                 | N/A                  |                         |                                       | N/A                             | N/A             | N/A           |              |                                       |
| Guinea-Bissau                    |                     |                      |                         |                                       |                                 |                 |               |              |                                       |
| Kenya                            | 200                 | 120                  |                         | 2014                                  | 382                             | 191             | 95            |              | 2014                                  |
| Lesotho                          | N/A                 | N/A                  |                         |                                       | N/A                             | N/A             | N/A           |              |                                       |
| Liberia                          | N/A                 | N/A                  |                         |                                       | N/A                             | N/A             | N/A           |              |                                       |
| Madagascar                       | N/A                 | N/A                  |                         |                                       | N/A                             | N/A             | N/A           |              |                                       |
| Malawi                           | 260                 | other                | 80 (4h)                 | 2005                                  | 140                             | other           | 60            |              | 2005                                  |
| Mali                             | N/A                 | N/A                  |                         |                                       | N/A                             | N/A             | N/A           |              |                                       |
| Mauritania                       |                     |                      |                         |                                       |                                 |                 |               |              |                                       |
| Mauritius                        | 94                  | other                |                         | 1998                                  | other                           | 187             | N/A           |              | 1998                                  |
| Mozambique                       | 160                 | other                | 24h 50 1y 70            | 2005                                  | 400                             | 200             | 100           |              | 2005                                  |
| Namibia                          | N/A                 | N/A                  |                         |                                       | N/A                             | N/A             | N/A           |              |                                       |
| Niger                            |                     |                      |                         |                                       |                                 |                 |               |              |                                       |
| Nigeria                          | N/A                 | N/A                  |                         |                                       | N/A                             | N/A             | N/A           |              |                                       |
| Rwanda                           | 240                 | other                | (8h) 1.25 ppm too high? | 2014                                  | 380                             | 190             | 96            | 150 (1month) | 2014                                  |
| Sao Tome and Principe            |                     |                      |                         |                                       |                                 |                 |               |              |                                       |
| Senegal                          | other               | 120                  |                         | 2003                                  | 200                             | other           | 40            |              | 2003                                  |
| Seychelles                       | N/A                 | N/A                  |                         |                                       | N/A                             | N/A             | N/A           |              |                                       |
| Sierra Leone                     |                     |                      |                         |                                       |                                 |                 |               |              |                                       |
| South Africa                     | other               | 120                  |                         | 2009                                  | 200                             | other           | 40            |              | 2009                                  |

|                                       | Ozone (O3)<br>µg/m3 |                      |       |                                       | Nitrogen dioxide (NO2)<br>µg/m3 |                 |               |                       |                                       |
|---------------------------------------|---------------------|----------------------|-------|---------------------------------------|---------------------------------|-----------------|---------------|-----------------------|---------------------------------------|
|                                       | O3 1 hour           | O3 8-hr<br>daily max | other | year set,<br>revised, or<br>published | NO2 1-h                         | NO2 24<br>hours | NO2 1<br>year | NO2 other             | year set,<br>revised, or<br>published |
| South Sudan                           |                     |                      |       |                                       |                                 |                 |               |                       |                                       |
| Swaziland                             | N/A                 | N/A                  |       | 2012                                  | N/A                             | N/A             | 40            |                       | 2012                                  |
| Togo                                  | N/A                 | N/A                  |       |                                       | N/A                             | N/A             | N/A           |                       |                                       |
| Uganda                                | N/A                 | N/A                  |       |                                       | N/A                             | N/A             | N/A           |                       |                                       |
| United Republic of Tanzania           | other               | 120                  |       | 2007                                  | 150                             | 120             | other         | 0.1 ug/m3 annual mean | 2007                                  |
| Zambia                                | N/A                 | N/A                  |       | 1996                                  | 400                             | 150             | N/A           |                       | 1996                                  |
| Zimbabwe                              | N/A                 | N/A                  |       |                                       | N/A                             | N/A             | N/A           |                       |                                       |
| <b>Eastern Mediterranean Region</b>   |                     |                      |       |                                       |                                 |                 |               |                       |                                       |
| Afghanistan                           | N/A                 | 100                  |       | 2010                                  | 200                             | other           | 40            |                       | 2010                                  |
| Bahrain                               |                     |                      |       |                                       |                                 |                 |               |                       |                                       |
| Djibouti                              |                     |                      |       |                                       |                                 |                 |               |                       |                                       |
| Egypt                                 | 200                 | 120                  |       | 1994                                  | 400                             | 150             | N/A           |                       | 1994                                  |
| Iran (Islamic Republic of)            | other               | 100                  |       | 2011                                  | N/A                             | N/A             | 40            |                       | 2011                                  |
| Iraq                                  | N/A                 | N/A                  |       |                                       | N/A                             | N/A             | N/A           |                       |                                       |
| Jordan                                | N/A                 | N/A                  |       | !                                     | N/A                             | N/A             | N/A           |                       | !                                     |
| Kuwait                                | other               | 100                  |       | !                                     | 200                             | other           | 40            |                       | !                                     |
| Lebanon                               | 150                 | 100                  |       | !                                     | 200                             | 150             | 100           |                       | !                                     |
| Libya                                 |                     |                      |       |                                       |                                 |                 |               |                       |                                       |
| Morocco                               | N/A                 | N/A                  |       | 2009                                  | other                           | 20              | 50            |                       | 2009                                  |
| Oman                                  |                     |                      |       |                                       |                                 |                 |               |                       |                                       |
| Pakistan                              | 130                 | other                |       | 2010                                  | other                           | 80              | 40            |                       | 2010                                  |
| Qatar                                 |                     |                      |       |                                       |                                 |                 |               |                       |                                       |
| Saudi Arabia                          | 235                 | 157                  |       | !                                     | 660                             | other           | 100           |                       | !                                     |
| Somalia                               |                     |                      |       |                                       |                                 |                 |               |                       |                                       |
| Sudan                                 |                     |                      |       |                                       |                                 |                 |               |                       |                                       |
| Syrian Arab Republic                  | N/A                 | N/A                  |       | 2011                                  | 200                             | N/A             | N/A           |                       | 2011                                  |
| Tunisia                               |                     |                      |       |                                       |                                 |                 |               |                       |                                       |
| United Arab Emirates                  |                     |                      |       |                                       |                                 |                 |               |                       |                                       |
| Yemen                                 |                     |                      |       |                                       |                                 |                 |               |                       |                                       |
| <b>South-East Asia</b>                |                     |                      |       |                                       |                                 |                 |               |                       |                                       |
| Bangladesh                            | 235                 | 157                  |       | 2005                                  | N/A                             | N/A             | 100           |                       | 2005                                  |
| Bhutan                                | N/A                 | N/A                  |       |                                       | N/A                             | 80              | 60            |                       |                                       |
| Democratic People's Republic of Korea |                     |                      |       |                                       |                                 |                 |               |                       |                                       |
| India                                 | 180                 | 100                  |       | 2009                                  | other                           | 80              | 40            |                       | 2009                                  |

|                                  | Ozone (O3)<br>µg/m3 |                      |                               |                                       | Nitrogen dioxide (NO2)<br>µg/m3 |                 |               |                               |                                       |
|----------------------------------|---------------------|----------------------|-------------------------------|---------------------------------------|---------------------------------|-----------------|---------------|-------------------------------|---------------------------------------|
|                                  | O3 1 hour           | O3 8-hr<br>daily max | other                         | year set,<br>revised, or<br>published | NO2 1-h                         | NO2 24<br>hours | NO2 1<br>year | NO2 other                     | year set,<br>revised, or<br>published |
| Indonesia                        | 235                 | other                |                               | 2010                                  | other                           | 150             | 100           |                               | 2010                                  |
| Maldives                         | N/A                 | N/A                  |                               |                                       | N/A                             | N/A             | N/A           |                               |                                       |
| Myanmar                          | N/A                 | N/A                  |                               | 2014                                  | N/A                             | N/A             | N/A           |                               | 2014                                  |
| Nepal                            | N/A                 | N/A                  |                               | 2003                                  | other                           | 80              | 40            |                               | 2003                                  |
| Sri Lanka                        | 200                 | other                |                               | 2008                                  | 250                             | 100             | N/A           | 150 (8 hr)                    | 2008                                  |
| Thailand                         | 200                 | 140                  |                               | 2010                                  | other                           | 320             | 57            |                               | 2010                                  |
| Timor-Leste                      | N/A                 | N/A                  |                               |                                       | N/A                             | N/A             | N/A           |                               |                                       |
| <b>Western pacific</b>           |                     |                      |                               |                                       |                                 |                 |               |                               |                                       |
| Australia                        | 200                 | 170                  |                               | 2008                                  | 230                             | other           | 60            |                               | 2008                                  |
| Brunei Darussalam                | N/A                 | N/A                  |                               |                                       | N/A                             | N/A             | N/A           |                               |                                       |
| Cambodia                         | 200                 | other                |                               | 2000                                  | 300                             | 100             | N/A           |                               | 2000                                  |
| China                            | 200                 | 160                  | city region with diff. values | 2014                                  | 200                             | 80              | 40            | city region with diff. values | 2014                                  |
| Cook Islands                     |                     |                      |                               |                                       |                                 |                 |               |                               |                                       |
| Fiji                             | other               | 100                  |                               |                                       | 200                             | other           | 40            |                               |                                       |
| Japan                            | 118                 | other                |                               | !                                     | other                           | 113             | N/A           |                               | !                                     |
| Kiribati                         | N/A                 | N/A                  |                               |                                       | N/A                             | N/A             | N/A           |                               |                                       |
| Lao People's Democratic Republic | N/A                 | N/A                  |                               |                                       | N/A                             | N/A             | N/A           |                               |                                       |
| Malaysia                         | 200                 | 120                  |                               | 2015                                  | 320                             | 75              | N/A           |                               | 2015                                  |
| Marshall Islands                 | N/A                 | N/A                  |                               |                                       | N/A                             | N/A             | N/A           |                               |                                       |
| Micronesia (Federated States of) | N/A                 | N/A                  |                               |                                       | N/A                             | N/A             | N/A           |                               |                                       |
| Mongolia                         | N/A                 | 100                  |                               | 2007                                  | other                           | 40              | 30            | 85 (20 mins)                  | 2007                                  |
| Nauru                            | N/A                 | N/A                  |                               |                                       | N/A                             | N/A             | N/A           |                               |                                       |
| New Zealand                      | 150                 | other                |                               | 2011                                  | 200                             | 100             | N/A           |                               | 2011                                  |
| Niue                             | N/A                 | N/A                  |                               |                                       | N/A                             | N/A             | N/A           |                               |                                       |
| Palau                            | N/A                 | N/A                  |                               |                                       | N/A                             | N/A             | N/A           |                               |                                       |
| Papua New Guinea                 | N/A                 | N/A                  |                               | 2010                                  | N/A                             | N/A             | N/A           |                               | 2010                                  |
| Philippines                      | 140                 | 60                   |                               | 2014                                  | other                           | 150             | N/A           |                               | 2014                                  |
| Republic of Korea                | 200                 | 120                  |                               | 2013                                  | 190                             | 115             | 57            |                               | 2013                                  |
| Samoa                            | N/A                 | N/A                  |                               |                                       | N/A                             | N/A             | N/A           |                               |                                       |
| Singapore                        | other               | 147                  | lower targets by 2020         | 2014                                  | N/A                             | N/A             | 100           | lower targets by 2020         | 2014                                  |
| Solomon Islands                  | N/A                 | N/A                  |                               |                                       | N/A                             | N/A             | N/A           |                               |                                       |
| Tonga                            | N/A                 | N/A                  |                               | 2015                                  | N/A                             | N/A             | N/A           |                               | 2015                                  |
| Tuvalu                           | N/A                 | N/A                  |                               |                                       | N/A                             | N/A             | N/A           |                               |                                       |
| Vanuatu (Palestine)              |                     |                      |                               |                                       |                                 |                 |               |                               |                                       |

|                                | Sulphur dioxide (SO <sub>2</sub> )<br>µg/m <sup>3</sup> |                           |                             |                           |                                       |                                       |
|--------------------------------|---------------------------------------------------------|---------------------------|-----------------------------|---------------------------|---------------------------------------|---------------------------------------|
|                                | SO <sub>2</sub> 10<br>minutes                           | SO <sub>2</sub> 1<br>hour | SO <sub>2</sub> 24<br>hours | SO <sub>2</sub> 1<br>year | other                                 | year set,<br>revised, or<br>published |
| <b>WHO AQGs</b>                | 500                                                     |                           | 20                          |                           |                                       | 2006                                  |
| <b>WHO REGIONS AQGs</b>        |                                                         |                           |                             |                           |                                       |                                       |
| <b>European Region</b>         |                                                         |                           |                             |                           |                                       |                                       |
| <b>EU Directive 2008/50/EC</b> | other                                                   | 350                       | 125                         | N/A                       |                                       | 2008                                  |
| <i>Austria</i>                 | other                                                   | 200                       | 120                         | N/A                       | 20 (y) winter mean vegetation         | 2010                                  |
| <i>Belgium</i>                 | other                                                   | 350                       | 125                         | N/A                       |                                       | !                                     |
| <i>Bulgaria</i>                | N/A                                                     | N/A                       | N/A                         | N/A                       |                                       | 2011                                  |
| <i>Croatia</i>                 | other                                                   | 350                       | 125                         | other                     | 20 (y) winter mean vegetation         | 2010/2014                             |
| <i>Cyprus</i>                  | other                                                   | 350                       | 125                         | N/A                       |                                       |                                       |
| <i>Czech Republic</i>          | other                                                   | 350                       | 125                         | N/A                       |                                       |                                       |
| <i>Denmark</i>                 | other                                                   | 350                       | 125                         | N/A                       |                                       | 2010                                  |
| <i>Estonia</i>                 | other                                                   | 350                       | 125                         | N/A                       |                                       |                                       |
| <i>Finland</i>                 | other                                                   | 350                       | 125                         | N/A                       |                                       | 2011                                  |
| <i>France</i>                  | other                                                   | 350                       | 125                         | other                     | 20 (y) winter mean vegetation         | 2012                                  |
| <i>Germany</i>                 | other                                                   | 350                       | 125                         | 50                        |                                       | 2002                                  |
| <i>Greece</i>                  | other                                                   | 350                       | 125                         | N/A                       |                                       |                                       |
| <i>Hungary</i>                 | other                                                   | 350                       | 125                         | N/A                       |                                       |                                       |
| <i>Ireland</i>                 | other                                                   | 350                       | 125                         | N/A                       |                                       | 2011                                  |
| <i>Italy</i>                   | other                                                   | 350                       | 125                         | other                     | 20 (1y) vegetation                    | 2010                                  |
| <i>Latvia</i>                  | other                                                   | 350                       | 125                         | N/A                       |                                       |                                       |
| <i>Lithuania</i>               | other                                                   | 350                       | 125                         | other                     | 20 (1y) vegetation                    | 2005                                  |
| <i>Luxemburg</i>               | other                                                   | 350                       | 125                         | N/A                       |                                       | 2011                                  |
| <i>Malta</i>                   | other                                                   | 350                       | 125                         | N/A                       |                                       | 2015                                  |
| <i>The Netherlands</i>         | other                                                   | 350                       | 125                         | N/A                       |                                       | <2006                                 |
| <i>Poland</i>                  | other                                                   | 350                       | 125                         | N/A                       |                                       | 2012                                  |
| <i>Portugal</i>                | other                                                   | 350                       | 125                         | N/A                       |                                       |                                       |
| <i>Romania</i>                 | other                                                   | 350                       | 125                         | N/A                       |                                       |                                       |
| <i>Slovakia</i>                | other                                                   | 350                       | 125                         | N/A                       |                                       |                                       |
| <i>Slovenia</i>                | other                                                   | 350                       | 125                         | N/A                       |                                       |                                       |
| <i>Spain</i>                   | other                                                   | 350                       | 125                         | other                     | 20 winter (1y)                        | 2011                                  |
| <i>Sweden</i>                  | other                                                   | 200                       | 100                         | 20                        | annual in order to protect vegetation | 2010                                  |
| <i>United Kingdom</i>          | other                                                   | 350                       | 125                         | other                     | 20 (y) winter mean vegetation         | 2010                                  |

|                                       | Sulphur dioxide (SO <sub>2</sub> )<br>µg/m <sup>3</sup> |                           |                             |                           |                                           | year set,<br>revised, or<br>published |
|---------------------------------------|---------------------------------------------------------|---------------------------|-----------------------------|---------------------------|-------------------------------------------|---------------------------------------|
|                                       | SO <sub>2</sub> 10<br>minutes                           | SO <sub>2</sub> 1<br>hour | SO <sub>2</sub> 24<br>hours | SO <sub>2</sub> 1<br>year | other                                     |                                       |
| Albania                               | N/A                                                     | N/A                       | N/A                         | 50                        |                                           | 2003                                  |
| Andorra                               | other                                                   | 350                       | 125                         | 20                        |                                           | 2009                                  |
| Armenia                               | N/A                                                     | N/A                       | N/A                         | other                     | 1 time 0.5 mg/m <sup>3</sup> MPC 50 (1y?) | 2006                                  |
| Azerbaijan                            | N/A                                                     | N/A                       | other                       | N/A                       | MAC 50                                    | 2011                                  |
| Belarus                               | N/A                                                     | N/A                       | N/A                         | N/A                       |                                           | 2010                                  |
| Bosnia and Herzegovina                | other                                                   | 350                       | 125                         | 50                        | Winter vegetation protection 20           | 2012                                  |
| Georgia                               |                                                         |                           |                             |                           |                                           |                                       |
| Iceland                               | other                                                   | 350                       | 125                         | 20                        |                                           | 2002                                  |
| Israel                                | other                                                   | 350                       | 50                          | 20                        |                                           | 2014                                  |
| Kazakhstan                            | N/A                                                     | N/A                       | 125                         | N/A                       |                                           | 2012                                  |
| Kyrgyzstan                            | N/A                                                     | N/A                       | 50                          | N/A                       | MAC 500                                   | !                                     |
| Monaco                                |                                                         |                           |                             |                           |                                           |                                       |
| Montenegro                            | other                                                   | 350                       | 110                         | N/A                       |                                           | 2015                                  |
| Norway                                | other                                                   | 350                       | 125                         | 20                        |                                           | 2007                                  |
| Republic of Moldova                   | N/A                                                     | N/A                       | N/A                         | N/A                       |                                           |                                       |
| Russian Federation                    | N/A                                                     | N/A                       | 50                          | N/A                       | 500 (20min)                               | !                                     |
| San Marino                            | N/A                                                     | N/A                       | N/A                         | N/A                       |                                           | 2012                                  |
| Serbia                                | other                                                   | 350                       | 125                         | 50                        | winter 20                                 | 2009                                  |
| Switzerland                           | N/A                                                     | N/A                       | 100                         | 30                        |                                           | 2015                                  |
| Tajikistan                            | N/A                                                     | N/A                       | other                       | other                     | MAC 50                                    | 2010                                  |
| Former Yugoslav Republic of Macedonia | other                                                   | 350                       | 125                         | 20                        |                                           | 2011                                  |
| Turkey                                | other                                                   | 500                       | 250                         | 150                       |                                           | 2008                                  |
| Turkmenistan                          | N/A                                                     | N/A                       | 50                          | N/A                       | MAC 500                                   | 1996                                  |
| Ukraine                               | N/A                                                     | N/A                       | N/A                         | other                     | MAC 50                                    |                                       |
| Uzbekistan                            | N/A                                                     | N/A                       | 200                         | 50                        |                                           | 2010                                  |
| <b>Region of the Americas</b>         |                                                         |                           |                             |                           |                                           |                                       |
| Antigua and Barbuda                   | N/A                                                     | N/A                       | N/A                         | N/A                       |                                           |                                       |
| Argentina                             | N/A                                                     | N/A                       | N/A                         | N/A                       | (1 month), city region with diff. AQS     | 2013                                  |
| Bahamas                               | other                                                   | 350                       | 125                         | other                     | 20 (1y) winter                            |                                       |
| Barbados                              | N/A                                                     | N/A                       | N/A                         | N/A                       |                                           | 2000                                  |
| Belize                                | N/A                                                     | N/A                       | N/A                         | N/A                       |                                           | 2003                                  |
| Bolivia (Plurinational State of)      | other                                                   | 80                        | 365                         | N/A                       | city region with diff. 10min 24h AQS      | 2013                                  |
| Brazil                                | other                                                   | 80                        | 365                         | N/A                       |                                           | 2013                                  |
| Canada                                | N/A                                                     | N/A                       | N/A                         | N/A                       | city region with diff. 10min AQS          | 2013                                  |

|                                    | Sulphur dioxide (SO <sub>2</sub> )<br>µg/m <sup>3</sup> |                           |                             |                           |                                         | year set,<br>revised, or<br>published |
|------------------------------------|---------------------------------------------------------|---------------------------|-----------------------------|---------------------------|-----------------------------------------|---------------------------------------|
|                                    | SO <sub>2</sub> 10<br>minutes                           | SO <sub>2</sub> 1<br>hour | SO <sub>2</sub> 24<br>hours | SO <sub>2</sub> 1<br>year | other                                   |                                       |
| Chile                              | other                                                   | 80                        | 250                         | N/A                       |                                         | 2013                                  |
| Colombia                           | other                                                   | 80                        | 250                         | N/A                       |                                         | 2013                                  |
| Costa Rica                         | other                                                   | 80                        | 365                         | N/A                       |                                         | 2013                                  |
| Cuba                               | N/A                                                     | N/A                       | N/A                         | N/A                       |                                         | 2013                                  |
| Dominica                           | N/A                                                     | N/A                       | N/A                         | N/A                       |                                         | 2013                                  |
| Dominican Republic                 | other                                                   | 450                       | 150                         | 100                       |                                         | 2003                                  |
| Ecuador                            | other                                                   | 80                        | 350                         | N/A                       |                                         | 2013                                  |
| El Salvador                        | other                                                   | 80                        | 365                         | N/A                       |                                         | 2013                                  |
| Grenada                            |                                                         |                           |                             |                           |                                         |                                       |
| Guatemala                          | N/A                                                     | N/A                       | N/A                         | N/A                       |                                         |                                       |
| Guyana                             | N/A                                                     | N/A                       | N/A                         | N/A                       |                                         | 2000                                  |
| Haiti                              | N/A                                                     | N/A                       | N/A                         | N/A                       |                                         |                                       |
| Honduras                           | N/A                                                     | N/A                       | N/A                         | N/A                       |                                         |                                       |
| Jamaica                            | other                                                   | 700                       | 365                         | 80                        |                                         | 2013                                  |
| Mexico                             | other                                                   | 524                       | 288                         | 66                        |                                         | 2014                                  |
| Nicaragua                          | N/A                                                     | N/A                       | 365                         | 80                        |                                         | 2013                                  |
| Panama                             | N/A                                                     | other                     | 365                         | 80                        |                                         | 2013                                  |
| Paraguay                           | N/A                                                     | N/A                       | 20                          | N/A                       |                                         | 2015                                  |
| Peru                               | N/A                                                     | N/A                       | 20                          | N/A                       |                                         | 2013                                  |
| Saint Kitts and Nevis              | N/A                                                     | N/A                       | N/A                         | N/A                       |                                         |                                       |
| Saint Lucia                        | N/A                                                     | N/A                       | N/A                         | N/A                       |                                         | 2005                                  |
| Saint Vincent and the Grenadines   |                                                         |                           |                             |                           |                                         |                                       |
| Suriname                           | N/A                                                     | N/A                       | N/A                         | N/A                       |                                         |                                       |
| Trinidad and Tobago                | 500                                                     | other                     | 125                         | 50                        |                                         | 2014                                  |
| United States of America           | other                                                   | 196                       | N/A                         | N/A                       | ), city region with diff. values 1h 24h | 2016                                  |
| Uruguay                            | N/A                                                     | N/A                       | N/A                         | N/A                       |                                         |                                       |
| Venezuela (Bolivarian Republic of) | N/A                                                     | N/A                       | 365                         | 80                        |                                         | 2013                                  |
| <b>African Region</b>              |                                                         |                           |                             |                           |                                         |                                       |
| Algeria                            | N/A                                                     | other                     | other                       | N/A                       | 350 (?h)                                | 2006                                  |
| Angola                             | N/A                                                     | N/A                       | N/A                         | N/A                       |                                         |                                       |
| Benin                              | other                                                   | 1300                      | 200                         | 80                        |                                         | 2001                                  |
| Botswana                           | N/A                                                     | N/A                       | 300                         | 80                        | 160 (1 month)                           | 2000                                  |
| Burkina Faso                       | other                                                   | 200                       | N/A                         | N/A                       | 200-300 1h                              | 2000                                  |
| Burundi                            | N/A                                                     | N/A                       | N/A                         | N/A                       |                                         |                                       |

|                                  | Sulphur dioxide (SO <sub>2</sub> )<br>µg/m <sup>3</sup> |                           |                             |                           |       | year set,<br>revised, or<br>published |
|----------------------------------|---------------------------------------------------------|---------------------------|-----------------------------|---------------------------|-------|---------------------------------------|
|                                  | SO <sub>2</sub> 10<br>minutes                           | SO <sub>2</sub> 1<br>hour | SO <sub>2</sub> 24<br>hours | SO <sub>2</sub> 1<br>year | other |                                       |
| Cameroon                         | 500                                                     | other                     | 20                          | N/A                       |       |                                       |
| Cabo Verde                       |                                                         |                           |                             |                           |       |                                       |
| Central African Republic         | N/A                                                     | N/A                       | N/A                         | N/A                       |       |                                       |
| Chad                             | N/A                                                     | N/A                       | N/A                         | N/A                       |       | 2016                                  |
| Comoros                          |                                                         |                           |                             |                           |       |                                       |
| Congo                            | N/A                                                     | N/A                       | N/A                         | N/A                       |       |                                       |
| Côte d'Ivoire                    | N/A                                                     | N/A                       | N/A                         | N/A                       |       | 2015                                  |
| Democratic Republic of the Congo | N/A                                                     | N/A                       | N/A                         | N/A                       |       |                                       |
| Equatorial Guinea                |                                                         |                           |                             |                           |       |                                       |
| Eritrea                          | N/A                                                     | N/A                       | N/A                         | N/A                       |       |                                       |
| Ethiopia                         | N/A                                                     | N/A                       | N/A                         | N/A                       |       |                                       |
| Gabon                            | N/A                                                     | N/A                       | N/A                         | N/A                       |       |                                       |
| Gambia                           | N/A                                                     | N/A                       | 125                         | 50                        |       |                                       |
| Ghana                            | other                                                   | 100                       | N/A                         | 80                        |       | 2016                                  |
| Guinea                           | N/A                                                     | N/A                       | N/A                         | N/A                       |       |                                       |
| Guinea-Bissau                    |                                                         |                           |                             |                           |       |                                       |
| Kenya                            | 500                                                     | other                     | 80                          | 60                        |       | 2014                                  |
| Lesotho                          | N/A                                                     | N/A                       | N/A                         | N/A                       |       |                                       |
| Liberia                          | N/A                                                     | N/A                       | N/A                         | N/A                       |       |                                       |
| Madagascar                       | N/A                                                     | N/A                       | N/A                         | N/A                       |       |                                       |
| Malawi                           | other                                                   | 230                       | 210                         | 50                        |       | 2005                                  |
| Mali                             | N/A                                                     | N/A                       | N/A                         | N/A                       |       |                                       |
| Mauritania                       |                                                         |                           |                             |                           |       |                                       |
| Mauritius                        | other                                                   | 325                       | 186                         | 45                        |       | 1998                                  |
| Mozambique                       | other                                                   | 800                       | 365                         | 80                        |       | 2005                                  |
| Namibia                          | N/A                                                     | N/A                       | N/A                         | N/A                       |       |                                       |
| Niger                            |                                                         |                           |                             |                           |       |                                       |
| Nigeria                          | N/A                                                     | N/A                       | N/A                         | N/A                       |       |                                       |
| Rwanda                           | N/A                                                     | N/A                       | N/A                         | N/A                       |       | 2014                                  |
| Sao Tome and Principe            |                                                         |                           |                             |                           |       |                                       |
| Senegal                          | N/A                                                     | N/A                       | 125                         | 50                        |       | 2003                                  |
| Seychelles                       | N/A                                                     | N/A                       | N/A                         | N/A                       |       |                                       |
| Sierra Leone                     |                                                         |                           |                             |                           |       |                                       |
| South Africa                     | 500                                                     | 350                       | 125                         | 50                        |       | 2009                                  |



|                                       | Sulphur dioxide (SO <sub>2</sub> )<br>µg/m <sup>3</sup> |                           |                             |                           |                             | year set,<br>revised, or<br>published |
|---------------------------------------|---------------------------------------------------------|---------------------------|-----------------------------|---------------------------|-----------------------------|---------------------------------------|
|                                       | SO <sub>2</sub> 10<br>minutes                           | SO <sub>2</sub> 1<br>hour | SO <sub>2</sub> 24<br>hours | SO <sub>2</sub> 1<br>year | other                       |                                       |
| South Sudan                           |                                                         |                           |                             |                           |                             |                                       |
| Swaziland                             | N/A                                                     | N/A                       | 125                         | 50                        |                             | 2012                                  |
| Togo                                  | N/A                                                     | N/A                       | N/A                         | N/A                       |                             |                                       |
| Uganda                                | N/A                                                     | N/A                       | N/A                         | N/A                       |                             |                                       |
| United Republic of Tanzania           | 500                                                     | other                     | 100                         | 40                        | to 60 (y)                   | 2007                                  |
| Zambia                                | 500                                                     | 350                       | 125                         | other                     | 50 (6 months)               | 1996                                  |
| Zimbabwe                              | N/A                                                     | N/A                       | N/A                         | N/A                       |                             |                                       |
| <b>Eastern Mediterranean Region</b>   |                                                         |                           |                             |                           |                             |                                       |
| Afghanistan                           | 500                                                     | other                     | 20                          | N/A                       |                             | 2010                                  |
| Bahrain                               |                                                         |                           |                             |                           |                             |                                       |
| Djibouti                              |                                                         |                           |                             |                           |                             |                                       |
| Egypt                                 | other                                                   | 350                       | 150                         | 60                        |                             | 1994                                  |
| Iran (Islamic Republic of)            | N/A                                                     | N/A                       | 100                         | 20                        |                             | 2011                                  |
| Iraq                                  | N/A                                                     | N/A                       | N/A                         | N/A                       |                             |                                       |
| Jordan                                | N/A                                                     | N/A                       | N/A                         | N/A                       |                             | !                                     |
| Kuwait                                | other                                                   | 75                        | 20                          | N/A                       |                             | !                                     |
| Lebanon                               | other                                                   | 350                       | 120                         | 80                        |                             | !                                     |
| Libya                                 |                                                         |                           |                             |                           |                             |                                       |
| Morocco                               | N/A                                                     | N/A                       | 125                         | N/A                       | 20 (y) ecosystem protection | 2009                                  |
| Oman                                  |                                                         |                           |                             |                           |                             |                                       |
| Pakistan                              | N/A                                                     | N/A                       | 120                         | 80                        |                             | 2010                                  |
| Qatar                                 |                                                         |                           |                             |                           |                             |                                       |
| Saudi Arabia                          | other                                                   | 730                       | 365                         | 80                        |                             | !                                     |
| Somalia                               |                                                         |                           |                             |                           |                             |                                       |
| Sudan                                 |                                                         |                           |                             |                           |                             |                                       |
| Syrian Arab Republic                  | other                                                   | 350                       | 125                         | N/A                       |                             | 2011                                  |
| Tunisia                               |                                                         |                           |                             |                           |                             |                                       |
| United Arab Emirates                  |                                                         |                           |                             |                           |                             |                                       |
| Yemen                                 |                                                         |                           |                             |                           |                             |                                       |
| <b>South-East Asia</b>                |                                                         |                           |                             |                           |                             |                                       |
| Bangladesh                            | N/A                                                     | N/A                       | 365                         | 80                        |                             | 2005                                  |
| Bhutan                                | N/A                                                     | N/A                       | 80                          | 60                        |                             |                                       |
| Democratic People's Republic of Korea |                                                         |                           |                             |                           |                             |                                       |
| India                                 | N/A                                                     | N/A                       | 80                          | 50                        |                             | 2009                                  |

|                                  | Sulphur dioxide (SO <sub>2</sub> )<br>µg/m <sup>3</sup> |                           |                             |                           |                               | year set,<br>revised, or<br>published |
|----------------------------------|---------------------------------------------------------|---------------------------|-----------------------------|---------------------------|-------------------------------|---------------------------------------|
|                                  | SO <sub>2</sub> 10<br>minutes                           | SO <sub>2</sub> 1<br>hour | SO <sub>2</sub> 24<br>hours | SO <sub>2</sub> 1<br>year | other                         |                                       |
| Indonesia                        | N/A                                                     | N/A                       | 365                         | 60                        |                               | 2010                                  |
| Maldives                         | N/A                                                     | N/A                       | N/A                         | N/A                       |                               |                                       |
| Myanmar                          | N/A                                                     | N/A                       | N/A                         | N/A                       |                               | 2014                                  |
| Nepal                            | N/A                                                     | N/A                       | 70                          | 50                        |                               | 2003                                  |
| Sri Lanka                        | other                                                   | 200                       | 80                          | N/A                       | 120 (8 hr)                    | 2008                                  |
| Thailand                         | other                                                   | 780                       | 300                         | 100                       |                               | 2010                                  |
| Timor-Leste                      | N/A                                                     | N/A                       | N/A                         | N/A                       |                               |                                       |
| <b>Western pacific</b>           |                                                         |                           |                             |                           |                               |                                       |
| Australia                        | other                                                   | 500                       | 200                         | 50                        |                               | 2008                                  |
| Brunei Darussalam                | N/A                                                     | N/A                       | N/A                         | N/A                       |                               |                                       |
| Cambodia                         | other                                                   | 500                       | 300                         | N/A                       |                               | 2000                                  |
| China                            | other                                                   | 500                       | 150                         | 60                        | city region with diff. values | 2014                                  |
| Cook Islands                     |                                                         |                           |                             |                           |                               |                                       |
| Fiji                             | 500                                                     | other                     | 20                          | N/A                       |                               |                                       |
| Japan                            | other                                                   | 262                       | 105                         | N/A                       |                               | !                                     |
| Kiribati                         | N/A                                                     | N/A                       | N/A                         | N/A                       |                               |                                       |
| Lao People's Democratic Republic | N/A                                                     | N/A                       | N/A                         | N/A                       |                               |                                       |
| Malaysia                         | other                                                   | 250                       | 105                         | N/A                       |                               | 2015                                  |
| Marshall Islands                 | N/A                                                     | N/A                       | N/A                         | N/A                       |                               |                                       |
| Micronesia (Federated States of) | N/A                                                     | N/A                       | N/A                         | N/A                       |                               |                                       |
| Mongolia                         | 500                                                     | other                     | 20                          | 10                        | 450 (20 mins)                 | 2007                                  |
| Nauru                            | N/A                                                     | N/A                       | N/A                         | N/A                       |                               |                                       |
| New Zealand                      | other                                                   | 350                       | 120                         | 50                        |                               | 2011                                  |
| Niue                             | N/A                                                     | N/A                       | N/A                         | N/A                       |                               |                                       |
| Palau                            | N/A                                                     | N/A                       | N/A                         | N/A                       |                               |                                       |
| Papua New Guinea                 | N/A                                                     | N/A                       | N/A                         | N/A                       |                               | 2010                                  |
| Philippines                      | N/A                                                     | N/A                       | 180                         | 80                        |                               | 2014                                  |
| Republic of Korea                | other                                                   | 400                       | 130                         | 50                        |                               | 2013                                  |
| Samoa                            | N/A                                                     | N/A                       | N/A                         | N/A                       |                               |                                       |
| Singapore                        | N/A                                                     | N/A                       | 365                         | 80                        | lower targets by 2020         | 2014                                  |
| Solomon Islands                  | N/A                                                     | N/A                       | N/A                         | N/A                       |                               |                                       |
| Tonga                            | N/A                                                     | N/A                       | N/A                         | N/A                       |                               | 2015                                  |
| Tuvalu                           | N/A                                                     | N/A                       | N/A                         | N/A                       |                               |                                       |
| Vanuatu (Palestine)              |                                                         |                           |                             |                           |                               |                                       |

|               | Sulphur dioxide (SO <sub>2</sub> )<br>µg/m <sup>3</sup> |                           |                             |                           |                   | year set,<br>revised, or<br>published |
|---------------|---------------------------------------------------------|---------------------------|-----------------------------|---------------------------|-------------------|---------------------------------------|
|               | SO <sub>2</sub> 10<br>minutes                           | SO <sub>2</sub> 1<br>hour | SO <sub>2</sub> 24<br>hours | SO <sub>2</sub> 1<br>year | other             |                                       |
| Viet Nam      | other                                                   | 350                       | 125                         | N/A                       |                   | 2013                                  |
|               |                                                         |                           |                             |                           |                   |                                       |
| <b>OTHER</b>  |                                                         |                           |                             |                           |                   |                                       |
| Gibraltar     | other                                                   | 350                       | 125                         | N/A                       |                   | 2010                                  |
| St Helena     | N/A                                                     | N/A                       | N/A                         | N/A                       |                   | 2012                                  |
| Liechtenstein | N/A                                                     | N/A                       | 100                         | 30                        | 100 (1/2h values) | 2008                                  |
| Taiwan        | N/A                                                     | N/A                       | 266                         | 80                        |                   | 2012                                  |

|                                | Carbon Monoxide (CO)<br>mg/m3 |           |           |                |                        | year set,<br>revised, or<br>published | Reference No   | Comments                                                            |
|--------------------------------|-------------------------------|-----------|-----------|----------------|------------------------|---------------------------------------|----------------|---------------------------------------------------------------------|
|                                | CO 15 min                     | CO 1 hour | CO 8 hour | CO 24<br>hours | CO other               |                                       |                |                                                                     |
| <b>WHO AQGs</b>                | 100                           | 35        | 10        | 7              |                        | 2010                                  |                |                                                                     |
| <b>WHO REGIONS AQGs</b>        |                               |           |           |                |                        |                                       |                |                                                                     |
| <b>European Region</b>         |                               |           |           |                |                        |                                       |                |                                                                     |
| <b>EU Directive 2008/50/EC</b> | N/A                           | N/A       | 7         | N/A            |                        | 2008                                  | [1]            |                                                                     |
| <i>Austria</i>                 | N/A                           | N/A       | 10        | N/A            |                        | 2010                                  | [2]            |                                                                     |
| <i>Belgium</i>                 | N/A                           | N/A       | 10        | N/A            |                        | !                                     | [3]            |                                                                     |
| <i>Bulgaria</i>                | N/A                           | N/A       | N/A       | N/A            |                        | 2011                                  | [4] [5]        | Clean ambient air act exists, no values defined, values from airlex |
| <i>Croatia</i>                 | N/A                           | N/A       | 10        | N/A            |                        | 2010/2014                             | [6] [7]        |                                                                     |
| <i>Cyprus</i>                  | N/A                           | N/A       | 10        | N/A            |                        |                                       | [1]            |                                                                     |
| <i>Czech Republic</i>          | N/A                           | N/A       | 10        | N/A            |                        |                                       | [8]            |                                                                     |
| <i>Denmark</i>                 | N/A                           | N/A       | 10        | N/A            |                        | 2010                                  | [9]            |                                                                     |
| <i>Estonia</i>                 | N/A                           | N/A       | 10        | N/A            |                        |                                       | [10]           |                                                                     |
| <i>Finland</i>                 | N/A                           | N/A       | 10        | N/A            |                        | 2011                                  | [11]           |                                                                     |
| <i>France</i>                  | N/A                           | N/A       | 10        | N/A            |                        | 2012                                  | [12]           |                                                                     |
| <i>Germany</i>                 | N/A                           | N/A       | N/A       | N/A            |                        | 2002                                  | [13]           |                                                                     |
| <i>Greece</i>                  | N/A                           | N/A       | 10        | N/A            |                        |                                       | [1]            |                                                                     |
| <i>Hungary</i>                 | N/A                           | N/A       | 10        | N/A            |                        |                                       | [1]            |                                                                     |
| <i>Ireland</i>                 | N/A                           | N/A       | 10        | N/A            |                        | 2011                                  | [14]           |                                                                     |
| <i>Italy</i>                   | N/A                           | N/A       | 10        | N/A            |                        | 2010                                  | [15]           |                                                                     |
| <i>Latvia</i>                  | N/A                           | N/A       | 10        | N/A            |                        | 2007                                  | [16]           |                                                                     |
| <i>Lithuania</i>               | N/A                           | N/A       | 10        | N/A            |                        | 2005                                  | [16]           | maybe Date is mistaken for when to be met                           |
| <i>Luxemburg</i>               | N/A                           | N/A       | 10        | N/A            |                        | 2011                                  | [17]           |                                                                     |
| <i>Malta</i>                   | N/A                           | N/A       | 10        | N/A            |                        | 2015                                  | [16]           |                                                                     |
| <i>The Netherlands</i>         | N/A                           | N/A       | 10        | N/A            |                        | <2006                                 | [18]           |                                                                     |
| <i>Poland</i>                  | N/A                           | N/A       | 10        | N/A            |                        | 2012                                  | [19]           |                                                                     |
| <i>Portugal</i>                | N/A                           | N/A       | 10        | N/A            |                        |                                       | [16]           |                                                                     |
| <i>Romania</i>                 | N/A                           | N/A       | 10        | N/A            |                        |                                       | [16]           |                                                                     |
| <i>Slovakia</i>                | N/A                           | N/A       | 10        | N/A            |                        |                                       | [16]           |                                                                     |
| <i>Slovenia</i>                | N/A                           | N/A       | 10        | N/A            |                        |                                       | [16]           |                                                                     |
| <i>Spain</i>                   | N/A                           | N/A       | 10        | N/A            |                        | 2011                                  | [20]           |                                                                     |
| <i>Sweden</i>                  | N/A                           | N/A       | 10        | N/A            |                        | 2010                                  | [21]           |                                                                     |
| <i>United Kingdom</i>          | N/A                           | N/A       | 10        | N/A            |                        | 2010                                  | [22]           | region with diff. AQS (scotland)                                    |
| Albania                        | N/A                           | 40        | 10        | 2              |                        | 2003                                  | [23] [24] [16] |                                                                     |
| Andorra                        | N/A                           | 40        | 10        | N/A            |                        | 2009                                  | [25]           |                                                                     |
| Armenia                        | other                         | N/A       | N/A       | 3              | ?, MPC 3.0 ug/m3 (1y?) | 2006                                  | [26] [27]      |                                                                     |
| Azerbaijan                     | N/A                           | N/A       | N/A       | 3              | MAC 3                  | 2011                                  | [28] [16]      |                                                                     |
| Belarus                        | N/A                           | N/A       | N/A       | N/A            |                        |                                       | [29]           |                                                                     |
| Bosnia and Herzegovina         | N/A                           | N/A       | 10        | 5              | 3 (1y)                 | 2012                                  | [30]           |                                                                     |
| Georgia                        |                               |           |           |                |                        |                                       | [31]           |                                                                     |
| Iceland                        | 100                           | 30        | 10        | N/A            |                        | 2002                                  | [32] [33]      |                                                                     |
| Israel                         | N/A                           | N/A       | N/A       | N/A            |                        |                                       | [34]           |                                                                     |
| Kazakhstan                     | N/A                           | N/A       | N/A       | N/A            |                        |                                       | [35]           |                                                                     |
| Kyrgyzstan                     | N/A                           | N/A       | N/A       | N/A            |                        | !                                     | [36] [37]      |                                                                     |
| Monaco                         |                               |           |           |                |                        |                                       | [16]           | unknown                                                             |
| Montenegro                     | N/A                           | N/A       | 10        | N/A            |                        | 2015                                  | [38] [39]      |                                                                     |

|                                       | Carbon Monoxide (CO)<br>mg/m3 |           |           |             |                             |                                 | Reference No   | Comments                    |
|---------------------------------------|-------------------------------|-----------|-----------|-------------|-----------------------------|---------------------------------|----------------|-----------------------------|
|                                       | CO 15 min                     | CO 1 hour | CO 8 hour | CO 24 hours | CO other                    | year set, revised, or published |                |                             |
| Norway                                | N/A                           | N/A       | 10        | N/A         |                             | 2007                            | [40]           |                             |
| Republic of Moldova                   | N/A                           | N/A       | N/A       |             |                             |                                 | [16] [41]      |                             |
| Russian Federation                    | other                         | N/A       | N/A       | 3           | 5 (20 mins)                 |                                 | [42]           |                             |
| San Marino                            | N/A                           | N/A       | N/A       | N/A         |                             | 2012                            | [43]           |                             |
| Serbia                                | N/A                           | N/A       | 10        | 5           | 3 (1 yr)                    | 2009                            | [44]           |                             |
| Switzerland                           | N/A                           | N/A       | N/A       | 8           |                             | 2015                            | [45]           |                             |
| Tajikistan                            | N/A                           | N/A       | N/A       | N/A         |                             | 2010                            | [46] [47] [48] |                             |
| Former Yugoslav Republic of Macedonia | N/A                           | N/A       | 10        | N/A         |                             |                                 | [49]           |                             |
| Turkey                                | N/A                           | N/A       | 10        | N/A         |                             |                                 | [50]           |                             |
| Turkmenistan                          | N/A                           | N/A       | N/A       | N/A         |                             | 1996                            | [51] [52]      |                             |
| Ukraine                               | N/A                           | N/A       | N/A       | N/A         | MAC 3                       |                                 | [53] [54]      |                             |
| Uzbekistan                            | N/A                           | N/A       | N/A       | N/A         |                             |                                 | [55] [53]      |                             |
| <b>Region of the Americas</b>         |                               |           |           |             |                             |                                 |                |                             |
| Antigua and Barbuda                   | N/A                           | N/A       | N/A       | N/A         |                             |                                 | [56]           |                             |
| Argentina                             | N/A                           | 58        | 12        | N/A         | ty region with diff. values |                                 | [57]           |                             |
| Bahamas                               | N/A                           | N/A       | N/A       | N/A         |                             |                                 | [7]            |                             |
| Barbados                              | N/A                           | N/A       | N/A       | N/A         |                             | 2000                            | [58] [16]      |                             |
| Belize                                | N/A                           | N/A       | N/A       | N/A         |                             | 2003                            | [59] [16]      |                             |
| Bolivia (Plurinational State of)      | N/A                           | 40        | 10        | N/A         | ty region with diff. values |                                 | [56]           |                             |
| Brazil                                | N/A                           | 40        | 10        | N/A         |                             |                                 | [56]           |                             |
| Canada                                | N/A                           | N/A       | N/A       | N/A         |                             |                                 | [60] [61]      |                             |
| Chile                                 | N/A                           | 30        | 10        | N/A         |                             |                                 | [56]           |                             |
| Colombia                              | N/A                           | 40        | 10        | N/A         |                             |                                 | [56]           |                             |
| Costa Rica                            | N/A                           | 40        | 10        | N/A         |                             |                                 | [56]           |                             |
| Cuba                                  | N/A                           | N/A       | N/A       | N/A         |                             |                                 | [56]           |                             |
| Dominica                              | N/A                           | N/A       | N/A       | N/A         |                             |                                 | [16] [62]      |                             |
| Dominican Republic                    | N/A                           | 40        | 10        | N/A         |                             | 2003                            | [63]           |                             |
| Ecuador                               | N/A                           | 40        | 10        | N/A         |                             |                                 | [56]           |                             |
| El Salvador                           | N/A                           | 40        | 10        | N/A         |                             |                                 | [56]           |                             |
| Grenada                               |                               |           |           |             |                             |                                 | [16]           | unclear as of 2005, unknown |
| Guatemala                             | N/A                           | N/A       | N/A       | N/A         |                             |                                 | [56]           |                             |
| Guyana                                | N/A                           | N/A       | N/A       | N/A         |                             | 2000                            | [16]           |                             |
| Haiti                                 | N/A                           | N/A       | N/A       | N/A         |                             |                                 | [56]           |                             |
| Honduras                              | N/A                           | N/A       | N/A       | N/A         |                             |                                 | [16] [56]      |                             |
| Jamaica                               | N/A                           | 40        | 10        | N/A         |                             |                                 | [56]           |                             |
| Mexico                                | N/A                           | N/A       | N/A       | N/A         |                             |                                 | [64]           |                             |
| Nicaragua                             | N/A                           | 40        | 10        | N/A         |                             |                                 | [56]           |                             |
| Panama                                | N/A                           | 30        | 10        | N/A         |                             |                                 | [56]           |                             |
| Paraguay                              | N/A                           | N/A       | 10        | N/A         |                             |                                 | [65] [66]      |                             |
| Peru                                  | N/A                           | 30        | 10        | N/A         |                             |                                 | [67]           |                             |
| Saint Kitts and Nevis                 | N/A                           | N/A       | N/A       | N/A         |                             |                                 | [16]           |                             |
| Saint Lucia                           | N/A                           | N/A       | N/A       | N/A         |                             | 2005                            | [16]           |                             |
| Saint Vincent and the Grenadines      |                               |           |           |             |                             |                                 | [16]           | unknown                     |
| Suriname                              | N/A                           | N/A       | N/A       | N/A         |                             |                                 | [16]           |                             |
| Trinidad and Tobago                   | 100                           | 30        | 10        | N/A         | 60 (30 mins)                | 2014                            | [68]           |                             |
| United States of America              | N/A                           | 43        | 11        | N/A         |                             |                                 | [69] [70]      |                             |

|                                    | Carbon Monoxide (CO)<br>mg/m3 |           |           |                |            | year set,<br>revised, or<br>published | Reference No   | Comments                                                                      |
|------------------------------------|-------------------------------|-----------|-----------|----------------|------------|---------------------------------------|----------------|-------------------------------------------------------------------------------|
|                                    | CO 15 min                     | CO 1 hour | CO 8 hour | CO 24<br>hours | CO other   |                                       |                |                                                                               |
| Uruguay                            | N/A                           | N/A       | N/A       | N/A            |            |                                       | [16] [56]      |                                                                               |
| Venezuela (Bolivarian Republic of) | N/A                           | 35        | 10        | N/A            |            |                                       | [56]           |                                                                               |
| <b>African Region</b>              |                               |           |           |                |            |                                       |                |                                                                               |
| Algeria                            | N/A                           | N/A       | N/A       | N/A            |            | 2006                                  | [71]           | averaging times not given 24h assumed                                         |
| Angola                             | N/A                           | N/A       | N/A       | N/A            |            |                                       | [16]           |                                                                               |
| Benin                              | N/A                           | 40        | 10        | N/A            |            | 2001                                  | [7] [72]       | Standards have to be promulgated                                              |
| Botswana                           | N/A                           | 40        | 10        | N/A            |            | 2000                                  | [72] [16]      | The emission and AQS setting stipulated in Atmospheric Pollution Prevention A |
| Burkina Faso                       | N/A                           | 30        | N/A       | N/A            |            |                                       | [72] [73]      | Standards have been adopted                                                   |
| Burundi                            | N/A                           | N/A       | N/A       | N/A            |            |                                       | [72] [16]      | Standards have not been introduced                                            |
| Cameroon                           | 100                           | 35        | 10        | 7              |            |                                       | [72] [16]      | Have to be promulgated                                                        |
| Cabo Verde                         |                               |           |           |                |            |                                       | [16]           | unknown                                                                       |
| Central African Republic           | N/A                           | N/A       | N/A       | N/A            |            |                                       | [16]           |                                                                               |
| Chad                               | N/A                           | N/A       | N/A       | N/A            |            | 2016                                  | [74]           |                                                                               |
| Comoros                            |                               |           |           |                |            |                                       | [16]           | unknown                                                                       |
| Congo                              | N/A                           | N/A       | N/A       | N/A            |            |                                       | [16] [72]      | Not yet promulgated as of 2006                                                |
| Côte d'Ivoire                      | N/A                           | N/A       | N/A       | N/A            |            | 20151                                 | [16]           | in the process of setting standards                                           |
| Democratic Republic of the Congo   | N/A                           | N/A       | N/A       | N/A            |            |                                       | [72]           | Standards have to be promulgated as of 2006                                   |
| Equatorial Guinea                  |                               |           |           |                |            |                                       | [16]           | unknown                                                                       |
| Eritrea                            | N/A                           | N/A       | N/A       | N/A            |            |                                       | [16]           |                                                                               |
| Ethiopia                           | N/A                           | N/A       | N/A       | N/A            |            |                                       | [72]           | Do not appear to be promulgated. US EPA standards are used.                   |
| Gabon                              | N/A                           | N/A       | N/A       | N/A            |            |                                       | [72]           | Have not been set                                                             |
| Gambia                             | N/A                           | N/A       | N/A       | N/A            |            |                                       | [7]            |                                                                               |
| Ghana                              | N/A                           | N/A       | N/A       | N/A            |            | 2016                                  | [7] [16]       |                                                                               |
| Guinea                             | N/A                           | N/A       | N/A       | N/A            |            |                                       | [72]           | Standards have to be promulgated as of 2006                                   |
| Guinea-Bissau                      |                               |           |           |                |            |                                       | [16]           | unknown                                                                       |
| Kenya                              | N/A                           | N/A       | 2         | N/A            |            | 2014                                  | [75]           | Standards are "Ambient Air Quality Tolerance Limits"                          |
| Lesotho                            | N/A                           | N/A       | N/A       | N/A            |            |                                       | [16]           |                                                                               |
| Liberia                            | N/A                           | N/A       | N/A       | N/A            |            |                                       | [72]           | Standards have to be promulgated                                              |
| Madagascar                         | N/A                           | N/A       | N/A       | N/A            |            |                                       | [72]           | Standards are not yet promulgated (2006)                                      |
| Malawi                             | N/A                           | 40        | 10        | N/A            |            | 2005                                  | [76]           |                                                                               |
| Mali                               | N/A                           | N/A       | N/A       | N/A            |            |                                       | [16]           | Standards have to be promulgated                                              |
| Mauritania                         |                               |           |           |                |            |                                       | [16] [77]      | unknown                                                                       |
| Mauritius                          | N/A                           | 23        | 9         | N/A            |            |                                       | [72] [78] [77] | Standards were set in 1998 and are under review                               |
| Mozambique                         | N/A                           | 40        | 10        | N/A            |            | 2005                                  | [79]           |                                                                               |
| Namibia                            | N/A                           | N/A       | N/A       | N/A            |            |                                       | [16]           |                                                                               |
| Niger                              |                               |           |           |                |            |                                       | [16]           | unknown                                                                       |
| Nigeria                            | N/A                           | N/A       | N/A       | N/A            |            |                                       | [72] [80]      | no mention on air quality standards but noise found                           |
| Rwanda                             | N/A                           | 4         | 2         | N/A            |            | 2014                                  | [16] [7]       |                                                                               |
| Sao Tome and Principe              |                               |           |           |                |            |                                       | [16]           | unknown                                                                       |
| Senegal                            | N/A                           | N/A       | N/A       | 30             | 0.5 (1 yr) | 2003                                  | [81]           |                                                                               |
| Seychelles                         | N/A                           | N/A       | N/A       | N/A            |            |                                       | [16]           |                                                                               |
| Sierra Leone                       |                               |           |           |                |            |                                       | [16]           | unknown                                                                       |
| South Africa                       | N/A                           | 30        | 10        | N/A            |            | 2009                                  | [82] [83]      |                                                                               |
| South Sudan                        |                               |           |           |                |            |                                       | [16]           | unknown                                                                       |
| Swaziland                          | N/A                           | N/A       | N/A       | N/A            |            |                                       | [77]           | Objectives                                                                    |
| Togo                               | N/A                           | N/A       | N/A       | N/A            |            |                                       | [72]           | AQM is at an initial (very early) stage, Standards are not promulgated        |

|                                       | Carbon Monoxide (CO)<br>mg/m <sup>3</sup> |           |           |                |                             | year set,<br>revised, or<br>published | Reference No  | Comments                                                              |
|---------------------------------------|-------------------------------------------|-----------|-----------|----------------|-----------------------------|---------------------------------------|---------------|-----------------------------------------------------------------------|
|                                       | CO 15 min                                 | CO 1 hour | CO 8 hour | CO 24<br>hours | CO other                    |                                       |               |                                                                       |
| Uganda                                | N/A                                       | N/A       | N/A       | N/A            |                             |                                       | [16]          | 2006:Standards developed, in stage of becoming law (enforcement weak) |
| United Republic of Tanzania           | 100                                       | 30        | 10        | N/A            | 60 (30 mins)                |                                       | [84]          |                                                                       |
| Zambia                                | 100                                       | 30        | 10        | N/A            | months), 1.0 (12 months)    |                                       | [85]          |                                                                       |
| Zimbabwe                              | N/A                                       | N/A       | N/A       | N/A            |                             |                                       | [16]          | Standards are not yet promulgated as of 2006                          |
| <b>Eastern Mediterranean Region</b>   |                                           |           |           |                |                             |                                       |               |                                                                       |
| Afghanistan                           | 100                                       | 35        | 10        | 7              |                             | 2010                                  | [16] [86]     |                                                                       |
| Bahrain                               |                                           |           |           |                |                             |                                       | [16]          | unknown                                                               |
| Djibouti                              |                                           |           |           |                |                             |                                       | [16]          | unknown                                                               |
| Egypt                                 | N/A                                       | 30        | 10        | N/A            |                             | 1994                                  | [87]          |                                                                       |
| Iran (Islamic Republic of)            | N/A                                       | 40        | 10        | N/A            |                             | 2011                                  | [88]          |                                                                       |
| Iraq                                  | N/A                                       | N/A       | N/A       | N/A            |                             |                                       | [89] [16]     |                                                                       |
| Jordan                                | N/A                                       | N/A       | N/A       | N/A            |                             |                                       | [7]           |                                                                       |
| Kuwait                                | N/A                                       | N/A       | 10        | N/A            |                             |                                       | !             | Guideline values                                                      |
| Lebanon                               | N/A                                       | 30        | 10        | N/A            |                             |                                       | !             |                                                                       |
| Libya                                 |                                           |           |           |                |                             |                                       | [72]          | UNEP: Standards are not yet promulgated, unknown                      |
| Morocco                               | N/A                                       | N/A       | N/A       | N/A            |                             | 2009                                  | [90]          |                                                                       |
| Oman                                  |                                           |           |           |                |                             |                                       | [16]          |                                                                       |
| Pakistan                              | N/A                                       | 10        | 5         | N/A            |                             | 2010                                  | [91]          | effective by 1.1.2013                                                 |
| Qatar                                 |                                           |           |           |                |                             | 2002                                  | [16]          | said to be higher than WHO, no specific data available from UNEP      |
| Saudi Arabia                          | N/A                                       | 40        | 10        | N/A            |                             |                                       | !             | [16] [7]                                                              |
| Somalia                               |                                           |           |           |                |                             |                                       | [16]          | unknown                                                               |
| Sudan                                 |                                           |           |           |                |                             |                                       | [16]          | there are AQS according to UNEP but unspecified by focal point        |
| Syrian Arab Republic                  | N/A                                       | N/A       | N/A       | N/A            |                             | 2011                                  | [16]          | UNEP: Ambient air quality standards has updated in 2011               |
| Tunisia                               |                                           |           |           |                |                             |                                       | [16]          |                                                                       |
| United Arab Emirates                  |                                           |           |           |                |                             |                                       | [16]          | unknown                                                               |
| Yemen                                 |                                           |           |           |                |                             |                                       | [16]          | unknown                                                               |
| <b>South-East Asia</b>                |                                           |           |           |                |                             |                                       |               |                                                                       |
| Bangladesh                            | N/A                                       | 40        | 10        | N/A            |                             | 2005                                  | [92]          |                                                                       |
| Bhutan                                | N/A                                       | 4         | 2         | N/A            |                             |                                       | [93] [16] [7] | Maximum permissible limits                                            |
| Democratic People's Republic of Korea |                                           |           |           |                |                             |                                       |               | unknown                                                               |
| India                                 | N/A                                       | 4         | 2         | N/A            |                             | 2009                                  | [94]          |                                                                       |
| Indonesia                             | N/A                                       | 30        | N/A       | N/A            |                             | 2010                                  | [95]          |                                                                       |
| Maldives                              | N/A                                       | N/A       | N/A       | N/A            |                             |                                       | [16]          |                                                                       |
| Myanmar                               | N/A                                       | N/A       | N/A       | N/A            |                             | 2014                                  | [96]          | first steps taken to develop AQS                                      |
| Nepal                                 | 100                                       | N/A       | 10        | N/A            |                             | 2003                                  | [97]          |                                                                       |
| Sri Lanka                             | N/A                                       | 30        | 10        | N/A            |                             | 2008                                  | [98]          |                                                                       |
| Thailand                              | N/A                                       | 30        | 9         | N/A            |                             | 2010                                  | [99]          |                                                                       |
| Timor-Leste                           | N/A                                       | N/A       | N/A       | N/A            |                             |                                       | [16]          |                                                                       |
| <b>Western pacific</b>                |                                           |           |           |                |                             |                                       |               |                                                                       |
| Australia                             | N/A                                       | N/A       | 11        | N/A            |                             | 2008                                  | [100] [101]   |                                                                       |
| Brunei Darussalam                     | N/A                                       | N/A       | N/A       | N/A            |                             |                                       | [16]          |                                                                       |
| Cambodia                              | N/A                                       | 40        | 20        | N/A            |                             | 2000                                  | [102]         |                                                                       |
| China                                 | N/A                                       | 10        | N/A       | 4              | ty region with diff. values | 2014                                  | [103] [104]   | Level II, Hong Kong and Macau with diff. values                       |
| Cook Islands                          |                                           |           |           |                |                             |                                       | [16]          | unknown                                                               |
| Fiji                                  | 100                                       | 35        | 10        | 7              |                             |                                       | [16]          |                                                                       |
| Japan                                 | N/A                                       | 12.5      | 25        | N/A            |                             |                                       | !             | [105]                                                                 |

|                                  | Carbon Monoxide (CO)<br>mg/m3 |           |           |             |                       |                                 | Reference No | Comments |
|----------------------------------|-------------------------------|-----------|-----------|-------------|-----------------------|---------------------------------|--------------|----------|
|                                  | CO 15 min                     | CO 1 hour | CO 8 hour | CO 24 hours | CO other              | year set, revised, or published |              |          |
| Kiribati                         | N/A                           | N/A       | N/A       | N/A         |                       |                                 | [16]         |          |
| Lao People's Democratic Republic | N/A                           | N/A       | N/A       | N/A         |                       |                                 | [16]         |          |
| Malaysia                         | N/A                           | 35        | 10        | N/A         |                       | 2015                            | [106]        |          |
| Marshall Islands                 | N/A                           | N/A       | N/A       | N/A         |                       |                                 | [16]         |          |
| Micronesia (Federated States of) | N/A                           | N/A       | N/A       | N/A         |                       |                                 | [16]         |          |
| Mongolia                         | other                         | 30        | 10        | N/A         | 60 (30 mins)          | 2007                            | [107]        |          |
| Nauru                            | N/A                           | N/A       | N/A       | N/A         |                       |                                 | [16]         |          |
| New Zealand                      | N/A                           | N/A       | 10        | N/A         |                       | 2011                            | [108]        |          |
| Niue                             | N/A                           | N/A       | N/A       | N/A         |                       |                                 | [16]         |          |
| Palau                            | N/A                           | N/A       | N/A       | N/A         |                       |                                 | [16]         |          |
| Papua New Guinea                 | N/A                           | N/A       | N/A       | N/A         |                       | 2010                            | [109]        |          |
| Philippines                      | N/A                           | 35        | 10        | N/A         |                       | 2014                            | [110]        |          |
| Republic of Korea                | N/A                           | 31.25     | 11.25     | N/A         |                       | 2013                            | [111]        |          |
| Samoa                            | N/A                           | N/A       | N/A       | N/A         |                       |                                 | [16]         |          |
| Singapore                        | N/A                           | 40        | 10        | N/A         | lower targets by 2020 | 2014                            | [95] [112]   |          |
| Solomon Islands                  | N/A                           | N/A       | N/A       | N/A         |                       |                                 | [16]         |          |
| Tonga                            | N/A                           | N/A       | N/A       | N/A         |                       | 2015                            | [16]         |          |
| Tuvalu                           | N/A                           | N/A       | N/A       | N/A         |                       |                                 | [16]         |          |
| Vanuatu (Palestine)              |                               |           |           |             |                       |                                 |              | unknown  |
| Viet Nam                         | N/A                           | 30        | 10        | N/A         |                       | 2013                            | [113]        |          |
| <b>OTHER</b>                     |                               |           |           |             |                       |                                 |              |          |
| Gibraltar                        | N/A                           | N/A       | 7         | N/A         |                       | 2010                            | [114]        |          |
| St Helena                        | N/A                           | N/A       | N/A       | N/A         |                       | 2012                            | [115]        |          |
| Liechtenstein                    | N/A                           | N/A       | 10        | 8           |                       | 2008                            | [116]        |          |
| Taiwan                           | N/A                           | 40.8      | 10.5      | N/A         |                       | 2012                            | [117]        |          |



## Online Resource 2. References to Online Resource 1.

- 1 European Parliament, *Directive 2008/50/EC of the European Parliament and of the Council of 21 May 2008 on ambient*  
*air quality and clear air for Europe*. . 2008, Official Journal of the European Union.
- 2 [Österreich: Umwelt Bundesamt. Limit, target and threshold values. 2016 23.06.2016](http://www.umweltbundesamt.at/umweltsituation/luft/luftguete_aktuell/grenzwerte/); Available from:  
[http://www.umweltbundesamt.at/umweltsituation/luft/luftguete\\_aktuell/grenzwerte/](http://www.umweltbundesamt.at/umweltsituation/luft/luftguete_aktuell/grenzwerte/).
- 3 Belgian Interregional Environment Agency, *ANNUAL REPORT Air Quality in Belgium 2011* . 2012, Belgian Interregional  
Environment Agency.
- 4 Bulgaria: Ministry of the Environment, *Clean Ambient Air Act* , M.o.t. Environment, Editor. 2011.
- 5 UNECE, *Environmental Performance Reviews: Bulgaria, 2nd Review* . 2000, United Nations Economic Commission for  
Europe.
- 6 Croatian Environment Agency, *Regulations* . 2015.
- 7 [Universidade de Aveiro: Instituto do Ambiente e Desenvolvimento. Airlex - Worldwide Air Quality Legislation. 2013](http://airlex.web.ua.pt/)  
[6.5.2013 \[cited 2016 16.6.2016\]](http://airlex.web.ua.pt/); Available from: <http://airlex.web.ua.pt/>.
- 8 Czech Hydrometeorological Institute, *AQIS emission limits* , C.H. Institute, Editor. 2012.
- 9 Denmark, *Order on the assessment and management of air quality* 2006.
- 10 European Environment Agency, *Air pollution fact sheet 2014: Estonia*. 2014.
- 11 Environmental Administration of Finland, *Air pollution control* , E. Administration, Editor. 2015.
- 12 French Republic: Ministry of the environment, e., and sea,, *Air quality standards* , d.l.É.e.d.l.M.M.o.t.e. Ministère de  
l'Environnement, energy, and sea], Editor. 2012 (updated 2015).
- 13 German Federal Ministry for the Environment, *Erste Allgemeine Verwaltungsvorschrift zum Bundes-*  
*Immissionsschutzgesetz (Technische Anleitung zur Reinhaltung der Luft-TA Luft) - First General Administrative Provision*  
*on the Federal Control Act* , B. (Deutschland), Editor. 2002.
- 14 Irish Government, *Air Quality Standards and Regulations 2011* . Iris Oifigiúil.
- 15 GAZZETTA UFFICIALE DELLA REPUBBLICA ITALIANA, *LEGGI ED ALTRI ATTI NORMATIVI* . 2010: GAZZETTA UFFICIALE  
DELLA REPUBBLICA ITALIANA Serie generale - n. 23.
- 16 United Nations Environment Programme, *Air quality policy catalogue* . 2015.
- 17 The Government of Luxemburg, *Air quality for Luxemburg* , M.f.L.-t.D.a. Infrastructures, Editor. 2011.  
[Rijkswaterstaat: Ministerie van Infrastruur en Milieu \(The Netherlands\). Grenswaarden en andere](http://www.infomil.nl/onderwerpen/klimaat-lucht/luchtkwaliteit/regelgeving/wet-milieubeheer/beoordelen/grenswaarden/)  
[luchtkwaliteitsnormen. 2016 \[cited 2016 8.7.2016\]](http://www.infomil.nl/onderwerpen/klimaat-lucht/luchtkwaliteit/regelgeving/wet-milieubeheer/beoordelen/grenswaarden/); Available from: [http://www.infomil.nl/onderwerpen/klimaat-](http://www.infomil.nl/onderwerpen/klimaat-lucht/luchtkwaliteit/regelgeving/wet-milieubeheer/beoordelen/grenswaarden/)
- 18 [lucht/luchtkwaliteit/regelgeving/wet-milieubeheer/beoordelen/grenswaarden/](http://www.infomil.nl/onderwerpen/klimaat-lucht/luchtkwaliteit/regelgeving/wet-milieubeheer/beoordelen/grenswaarden/).
- 19 Republic of Poland: Department of the Environment, *On the levels of certain substances in the air* , D.o.t. Environment,  
Editor. 2012.
- 20 Spain: Ministry of the Presidency, *General Provision: Real Decreto 102/2011, de 28 de enero, relativo a la mejora de la*  
*calidad del aire* . , M.o.t. President, Editor. 2011.
- 21 Swedish Environmental Protection Agency, *Swedish Code of Statutes: Air quality ordinance; SFS 2010:477* S.E.P. Agency,  
Editor. 2010.
- 22 United Kingdom: Department for Environment, F.a.R.A., *Air quality strategy for England, Scotland, Wales and Northern*  
*Ireland* , F.a.R.A. Department for Environment, Editor. 2007.
- 23 European Environment Agency, *Air pollution - State and impacts (Albania)* . 2015, European Environment Agency.
- 24 E-on, *Health Impact Assessment: Trans Adriatic Pipeline: ESIA Albania Annex 8.1 – Impact Assessment Data* . 2010.
- 25 Government of Andorra, *Butlletí Oficial del Principat d'Andorra: Reglament de control de la contaminació atmosfèrica* .  
2009.
- 26 Petikyan, A., *Air quality standards for Armenia* , M.K. Joss, Editor. 2015.
- 27 Armenia: Environmental Inspection of the Ministry of Nature Protection, *Air quality* , E.I.M.C. Armenia, Editor. 2002.
- 28 Europe, U.N.E.C.f., *Environmental Performance Review: Azerbaijan, 2nd Review*. 2011.
- 29 UNECE, *Environmental Performance Review: Belarus, 3rd Review* . 2014.
- 30 Bosnia & Herzegovina: Ministry of the Environment and Tourism, *Rules on the method of monitoring air quality and*  
*defining the types of pollutants, limit values and other standards for air quality* , M.o.t.E.a. Tourism, Editor. 2012.
- 31 UNECE, *Environmental Performance Review: Georgia, 3rd review* . 2016, United Nations Economic Commission for  
Europe.

32 Einarsson, E.e.a., *Hreint loft, betri heilsa - Umfjöllun um loftgæði og heilsufar á Íslandi ásamt tillögum til úrbóta*, E.a.N.R. Ministry, Editor. 2013, Iceland: Environment and Natural Resources Ministry: Reykjavik, Iceland.

33 Skúladóttir, B.T., A.; Larssen, S.; Bjarnason, G.; Þórðarson, H., *Method for determining the composition of airborne particle pollution*. Nordtest, 2003.

34 Dobnov, J., *Monitoring and modeling air pollution and its health effects: situation in Israel*. 2014. Republic of Kazakhstan, *Sanitary-epidemiological requirements for air quality in urban and rural areas, soils, and their security, maintenance of areas of urban and rural settlements, conditions of work with sources of physical factors affecting humans*, S 168. 2012.

35 UNECE, *Environmental Performance Review: Kyrgyzstan, 2nd review*. 2009, United Nations Economic Commission for Europe.

36 Government of Montenegro, *Regulation: Determination of Types of Pollutants, Limit Values, and Other Air Quality Standards*. 2007.

37 Government of Montenegro, *Law on Air pollution*. 2012.

38 Norwegian Climate and Environment Ministry, *Chapter 7. Local air quality* E. Agency, Editor. 2013.

39 Cojocar, A., *Air Pollution in the Republic of Moldova: Current Status and Future Prospects*. 2008, Springer Science + Business Media B.V.

40 Ministry of Health of the Russian Federation, h.s.s.d.o.t.R.F., *Maximum Allowable Concentration (MAC) of pollutants in ambient air in populated areas" Hygiene Norms (HG) 2.1.6.1338-03*, M.o.H.o.t.R. Federation, Editor. 2003.

41 Republic of San Marino, *Environmental Code*. 2009.

42 Republic of Serbia, *Regulation: On air quality requirements and monitoring conditions, official gazette of RS no. 1110 and no. 7510*, Ministry of Agriculture and Environmental Protection, Editor. 2009.

43 Schweizerischer Bundesrat, *Luftreinhalte-Verordnung (LRV)*. 1985 (Update 2016).

44 UNECE, *Environmental Performance Review: Tajikistan, 1st review*. 2004, United Nations Economic Commission for Europe: New York and Geneva.

45 Ministry of Transport and Communications for the Asian Development Bank (ADB), *Environmental Impact Assessment: Tajikistan: CAREC Corridor 3 (Dushanbe–Uzbekistan Border) Improvement Project*. 2010.

46 UNECE, *Environmental Performance Reviews: Tajikistan, 2nd Review*, U.N.E.C.f. Europe, Editor. 2012.

47 Republic of Macedonia, *Air quality assessment report*, M.o.E.a.P. Planning, Editor. 2012.

48 Turkish Ministry for the Environment and Forest (Çevre ve Orman Bakanlığı), *Hava kalitesi degerlendirme ve yönetmeliği*, in *Resmî Gazete*. 2008, Çevre ve Orman Bakanlığı: Ankara.

49 State Power Corporation "Turkmenenergo" of the Ministry of Energy of Turkmenistan for the Asian Development Bank, *TKM: Power Sector Efficiency Improvement and Export Project*. 2012.

50 UNECE, *Environmental Performance Review: Turkmenistan, 1st review synopsis*. 2012, United Nations Economic Commission for Europe.

51 World Health Organization, *Health basis for air quality management in Eastern Europe, Caucasus and Central Asia*. 2005.

52 UNECE, *Environmental Performance Review: Ukraine, 2nd review*. 2007, United Nations Economic Commission for Europe.

53 Republic of Uzbekistan, *Hygiene norms on ambient air quality in human settlements of the Republic of Uzbekistan*, C.o.H.S.o.t.R.o. Uzbekistan, Editor. 2010.

54 Clean Air Institute, *Air quality in Latin America: an overview*, C.A. Institute, Editor. 2013.

55 Argentina: Government of Buenos Aires, *National Law 20.284*, P.a.M.A.o.t.C.o.B.A. National Health, Editor. 1973.

56 Global Environmental Outlook - Barbados, *State of the Environment Report 2000: Chapter 8: Atmosphere and Climate*. 2000.

57 Government of Belize, *Subsidiary Laws of Belize: Environmental Protection: Chapter 238: Pollution Regulations*. 2003: Belmopan, Belize.

58 Canada: Environment and Climate Change, *Canadian ambient air quality standards*, E.a.C. Change, Editor. 2015.

59 British Columbia, *Provincial air quality objective: information sheet*. 2016.

60 IEA Clean Coal Centre, *Dominica*. unknown, IEA Clean Coal Centre,.

61 Dominican Republic: State Secretary on Air Quality and Natural Resources, *Ambient Norms on Air Quality and Emissions Control*, S.S.o.A.Q.a.N. Resources, Editor. 2003: Santo Domingo, Dominican Republic.

62

64 Mexico: Secretary of Health, *Proyecto de norma oficial mexicana proy-nom-025-SSA1-2014, salud ambiental. Valores limite permisibles para la concentracion de particulas suspendidas PM10 y PM2.5 en el aire ambiente y criterios para su evaluacion*, S.o. Health, Editor. 2014.

65 Government of Paraguay, *Permissible Air Quality Standards*, S.o.t. Environment, Editor. 2015: Asuncion, Paraguay.

66 Government of Paraguay, *PARAGUAY ADOPTS AIR QUALITY STANDARDS*, S.o.t.E.o. Paraguay, Editor. 2015.

67 Congress of the Republic of Peru, *Legal norms*. 2001, El Peruano.

68 Republic of Trinidad and Tobago, *The Environmental Management Act, Chap. 35:05: Air Pollution Rules, 2014*. 2015.

69 [US Environmental Protection Agency. National Ambient Air Quality Standards Table. 2016 5.7.2016 \[cited 2016 3.7.2016\]; Available from: https://www.epa.gov/criteria-air-pollutants/naaqs-table.](#)

70 California Air Resource Board, *Ambient air quality standards*, C.A.R. Board, Editor. 2015.

71 LA REPUBLIQUE ALGERIENNE, *Décret définissant les valeurs limites, les seuils d'alerte et les objectifs de qualité de l'air en cas de pollution atmosphérique*. 2006: JOURNAL OFFICIEL DE LA REPUBLIQUE ALGERIENNE N° 01.

72 Schwela, D., *Review of Urban Air Quality in Sub-Saharan Africa Region - Air Quality profile of SSA countries*. 2012, World Bank: Washington, DC. p. 251.

73 Republic of Burkina Faso, *Decree 20010185/PRES/PM/MEE Standards for emissions of air pollutants*. 2000.

74 Kessely, H., *Mail: stanard valeurs pour qualité de l'air au Tchad?* 2016.

75 Kenya, *THE ENVIRONMENTAL MANAGEMENT AND CO-ORDINATION (AIR QUALITY) REGULATIONS*, in *Kenya Gazette Supplement No.41*, Kenya Cabinet Secretary, Editor. 2014, Government Printer: Nairobi.

76 Mapoma, H.W.T.T., Chifundo; Tsakama, Madalitso; Kosamu, Ishmael Bobby Mphangwe, *Air quality assessment of carbon monoxide, nitrogen dioxide and sulfur dioxide levels in Blantyre, Malawi: a statistical approach to a stationary environmental monitoring station*. *African Journal of Environmental Science and Technology*, 2014. **8**(6): p. 330-343.

77 South African Development Community, *SADC environmental legislation, 3rd edition*, S.A.D. Community, Editor. 2012.

78 Government of Mauritius, *Mauritius Environment Outlook Report 2011*, M.o.E.S. Development, Editor. 2011.

79 Government of the Republic of Mozambique, *Handbook on Environmental Assessment Legislation in the SADC Region*. 2000.

80 [Nigeria: Federal Ministry of Environment. Environmental Policies. 2016 30.1.2014 \[cited 2016 1.7.2016\]; Available from: http://environment.gov.ng/index.php/downloads/3-environmental-policies.](#)

81 DEEC Senegal, *Senegalese Environmental Act: Atmospheric pollution: emission standards, NS 05-062, Octobre 2003*. 2003.

82 South African Bureau of Standards, *South African national standards: ambient air quality - limits for common pollutants*, S.A.B.o. Standards, Editor. 2012, Departement of Environmental Affairs.

83 Republic of South Africa, *Ambient air quality - Limits for common pollutants*, in *SANS 1929 (2011)*. 2011, Republic of South Africa,.

84 Government of Tanzania, *THE ENVIRONMENTAL MANAGEMENT (AIR QUALITY STANDARDS) REGULATIONS*. 2007: Dar es Salaam.

85 Zambia, *Environmental protection and pollution control (amendment) act, Cap 204*.

86 Malikyar, G.M., *Air Quality Management in Afghanistan*, in *Fifth Governmental Meeting on Urban Air Quality in Asia*. 2014, Afghanistan: National Environment Protection Agency,; Sri Lanka.

87 Egypt: Ministry of State for Environmental Affairs Egyptian Environmental Affairs Agency, *Executive Regulations of the Environmental Law no. 4 of Egypt* M.o.S.f.E.A.E.E.A. Agency, Editor. 2009.

88 Iran: Department of the Environment, *Human's Environmental Laws, Regulation Criteria and Standards*, D.o.t. Environment, Editor. 2013: Teheran. p. 339.

89 Iraq: Ministry of the Environment, *The National Enviromental Strategy & Action Plan for Iraq*, M.o.t. Environment, Editor. 2013.

90 UNECE, *Environmental Performance Review: Morocco*. 2014, United Nations Economic Commission for Europe.

91 Government of Pakistan, *National Environmental Quality Standards for Ambient Air*, M.o. Environment, Editor. 2010, Government of Pakistan: Islamabad, Pakistan.

92 Clean Air Initiative for Asian Cities, *Country Synthesis Report, Urban Air Quality Management: Bangladesh*. 2006. Asian Development Bank and the Clean Air Initiative for Asian Cities (CAI-Asia) Center, *Country Synthesis Report on Urban Air Quality Management: Bhutan*. 2006, Asian Development Bank and the Clean Air Initiative for Asian Cities (CAI-Asia) Center.

93

- 94 India: Central Pollution Control Board, M.o.E.F., *National Ambient Air Quality Status & Trends 2012*. 2014.
- 95 Clean Air Initiative for Asian Cities, *Air Quality in Asia: Status and Trends, 2010 edition*. 2010.
- 96 ASEAN - German Technical Cooperation Clean Air for Smaller Cities in the ASEAN Region, *Myanmar Country Profile: Focus on Cities*, D.O.M.T.H.M.K.P.M.C. Capadocia, Editor. 2014.
- 97 Nepal: Ministry of Environment, *Annex 7.1 National Ambient Air Quality Standards for Nepal, 2003* 2003.
- 98 Sri Lanka: Central Environmental Authority, *The Gazete of the Democratic Socialist Republic of Sri Lanka: No. 1562/22*. 2008.
- 99 Thailand: Ministry of Natural Resources and Environment: Pollution Control Department, *Thai Environmental Regulations: Air quality and noise standards*, M.o.N.R.a.E.P.C. Department, Editor. 2008.
- 100 Australia: Department of the Environment, *Air quality standards*, D.o.t. Environment, Editor. 2008.
- 101 Morawka, L., *Email: Ambient Air Quality Standards for Territories / Islands under the Sovereignty of Australia*. 2016.
- 102 Cambodia (the Kingdom of), *ANUKRET on The Control of Air Pollution and Noise Disturbance*. 2000.
- 103 TransportPolicy.net, *China: Air Quality Standards*. 2014.
- 104 Yang, X., *Email: AQS for Macau and Hong Kong*, M. Kutlar Joss, Editor. 2016.
- 105 Japan: Ministry of the Environment, *Environmental quality standards in Japan - air quality*, M.o.t. Environment, Editor.
- 106 Malaysia: Ministry of Environmental Resources & Management, *New Malaysia Ambient Air Quality Standard*. ?
- 107 Mongolia: Air quality department, *Air quality Technical Requirements (MNS 4585: 2007)*. 2007.
- 108 New Zealand: Ministry for the Environment, *Resource management (national environmental standards for air quality): regulations 2004, reprinted with amendments 17 October 2014*, M.f.t. Environment, Editor. 2011.
- 109 Esso Highlands Limited, *Papua New Guinea LNG Project: Environmental and Social Management Plan Appendix 2: Air Emissions Management Plan*. 2010.
- 110 Environmental Management Bureau of the Philippines, *National air quality status report 2010-2011*, D.o.E.a.N. Resources, Editor. 2012: Quezon City, Philippines.
- 111 Government of Korea, *Air quality standards and air pollution levels*, M.o. Environment, Editor. 2016.
- 112 [Singapore: National Environment Agency. Air Quality and Targets. 2016 26.3.2016 \[cited 2016 9.7.2016\]; Available from: http://www.nea.gov.sg/anti-pollution-radiation-protection/air-pollution-control/air-quality-and-targets.](http://www.nea.gov.sg/anti-pollution-radiation-protection/air-pollution-control/air-quality-and-targets)
- 113 The Socialist Republic of Vietnam, *National technical regulation on ambient air quality, QCVN 05:2013/BTNMT*. 2013.
- 114 [Environmental Agency for the Government of Gibraltar. Air Quality in Gibraltar: Air Quality Standards. 2016 \[cited 2016 8.7.2016\]; Available from: http://www.gibraltairquality.gi/air-quality/.](http://www.gibraltairquality.gi/air-quality/)
- 115 Pelembe, T., *St. Helena: Draft National Environmental Management Plan 2012 - 2022 (Draft)*. 2012, Environmental Management Directorate St. Helena,. p. 30.
- 116 Liechtenstein, *Luftreinhalteverordnung (LRV) vom 30. September 2008*, in 245, Liechtenstein, Editor. 2008, Liechtensteinisches Landesgesetzblatt.
- 117 [Taiwan: Environmental Protection Administration Executive Yuan R.O.C. \(Taiwan\). Taiwan Air Quality Monitoring Network: Air Quality Standards. 2016 5.7.2016 \[cited 2016 11.7.2016\]; Available from: http://taqm.epa.gov.tw/taqm/en/b0206.aspx.](http://taqm.epa.gov.tw/taqm/en/b0206.aspx)

Online Resource 3. World map of national air quality standards for annual mean concentration of PM<sub>2.5</sub> in relation to WHO air quality guideline values (WHO-AQG) and interim targets.  
(TSP total suspended particulates)

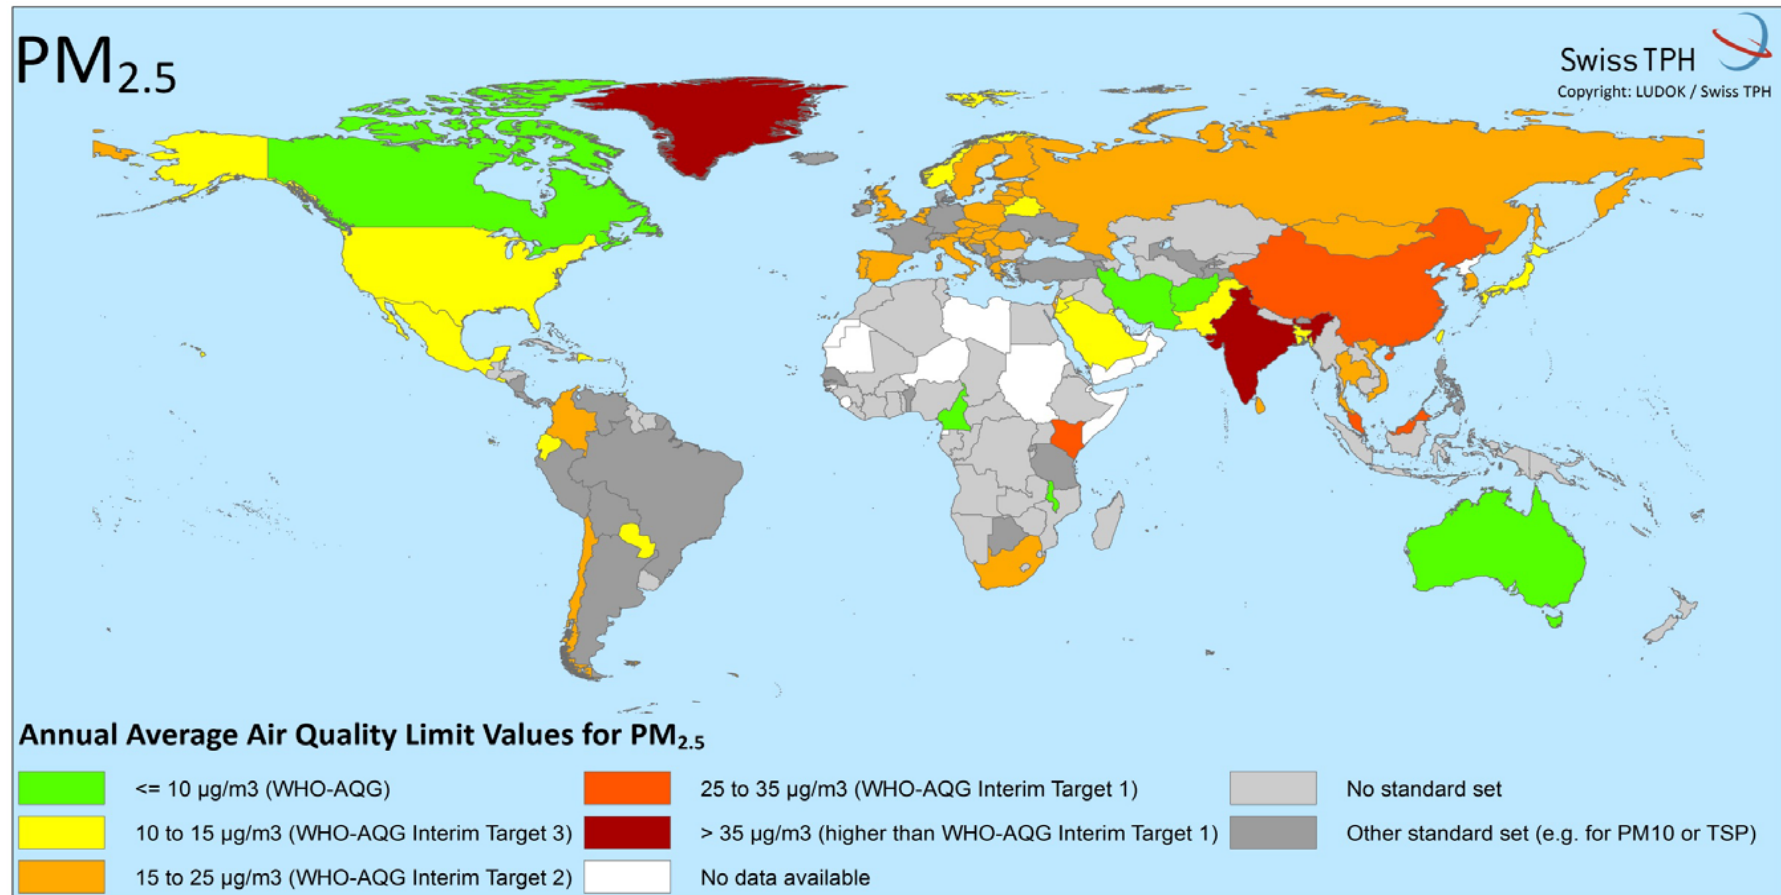

Online Resource 4. World map of national air quality standards for annual mean concentration of SO<sub>2</sub> in relation to WHO air quality guideline values (WHO-AQG) and interim targets.

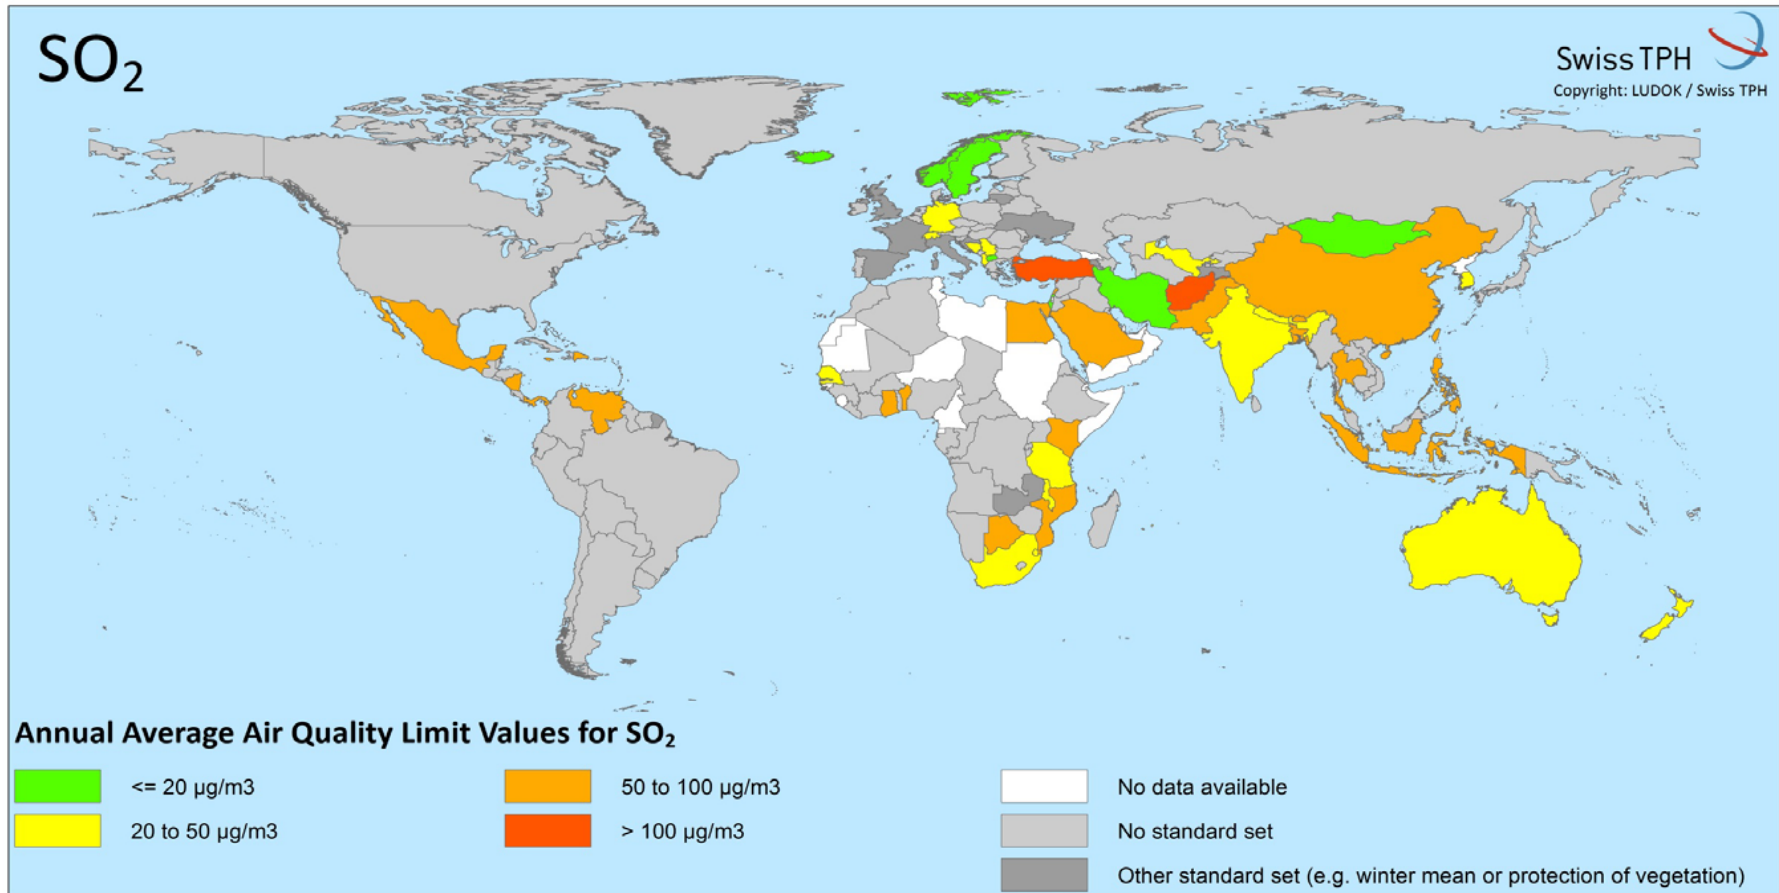

Online Resource 5. World map of national air quality standards for daily mean concentration of PM<sub>10</sub> in relation to WHO air quality guideline values (WHO-AQG) and interim targets.  
 (TSP total suspended particulates)

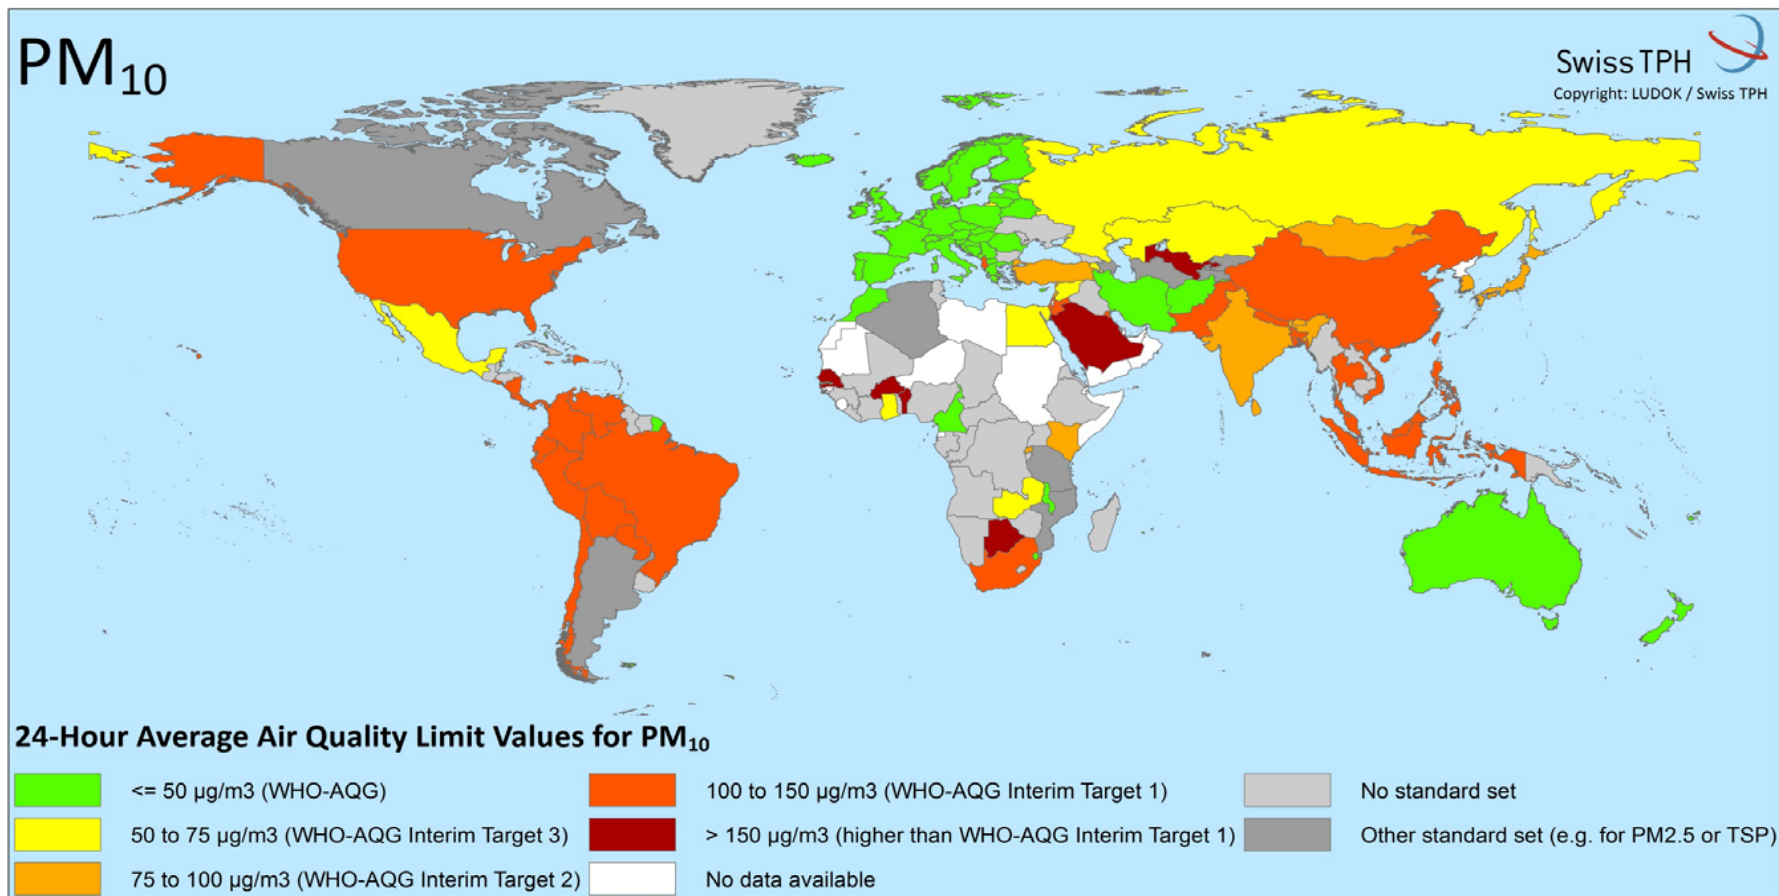

Online Resource 6. World map of national air quality standards for daily mean concentration of PM<sub>2.5</sub> in relation to WHO air quality guideline values (WHO-AQG) and interim targets.  
 (TSP total suspended particulates)

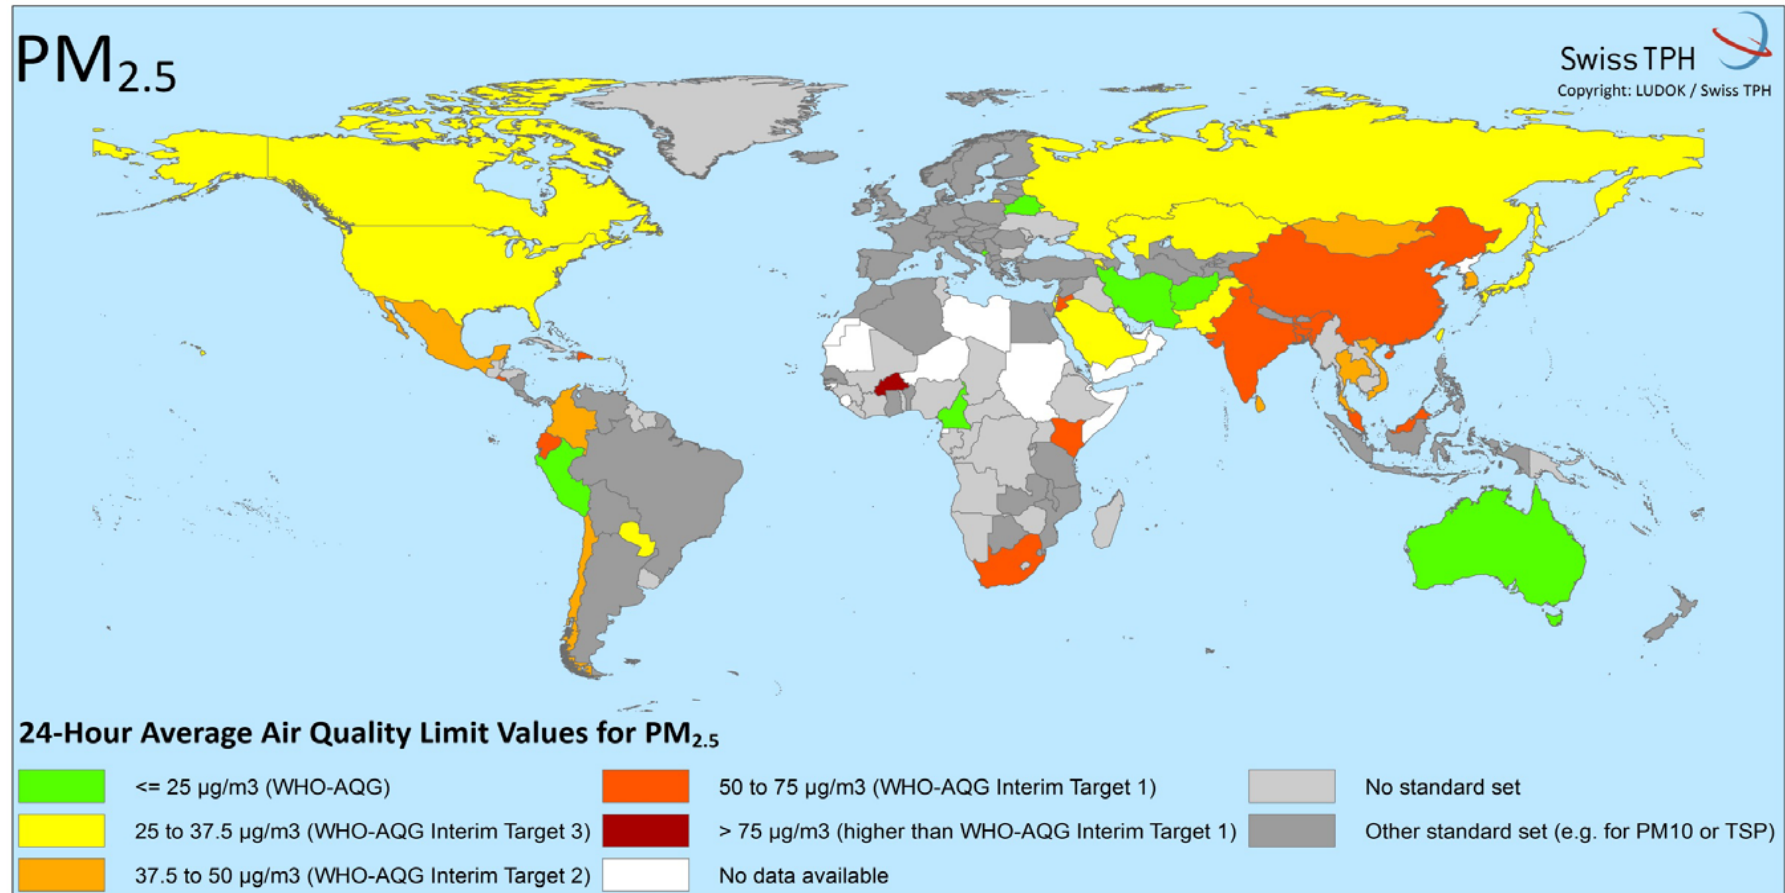



Online Resource 7. World map of national air quality standards for daily mean concentration of SO<sub>2</sub> in relation to WHO air quality guideline values (WHO-AQG) and interim targets.  
(MAC maximum allowable concentration)

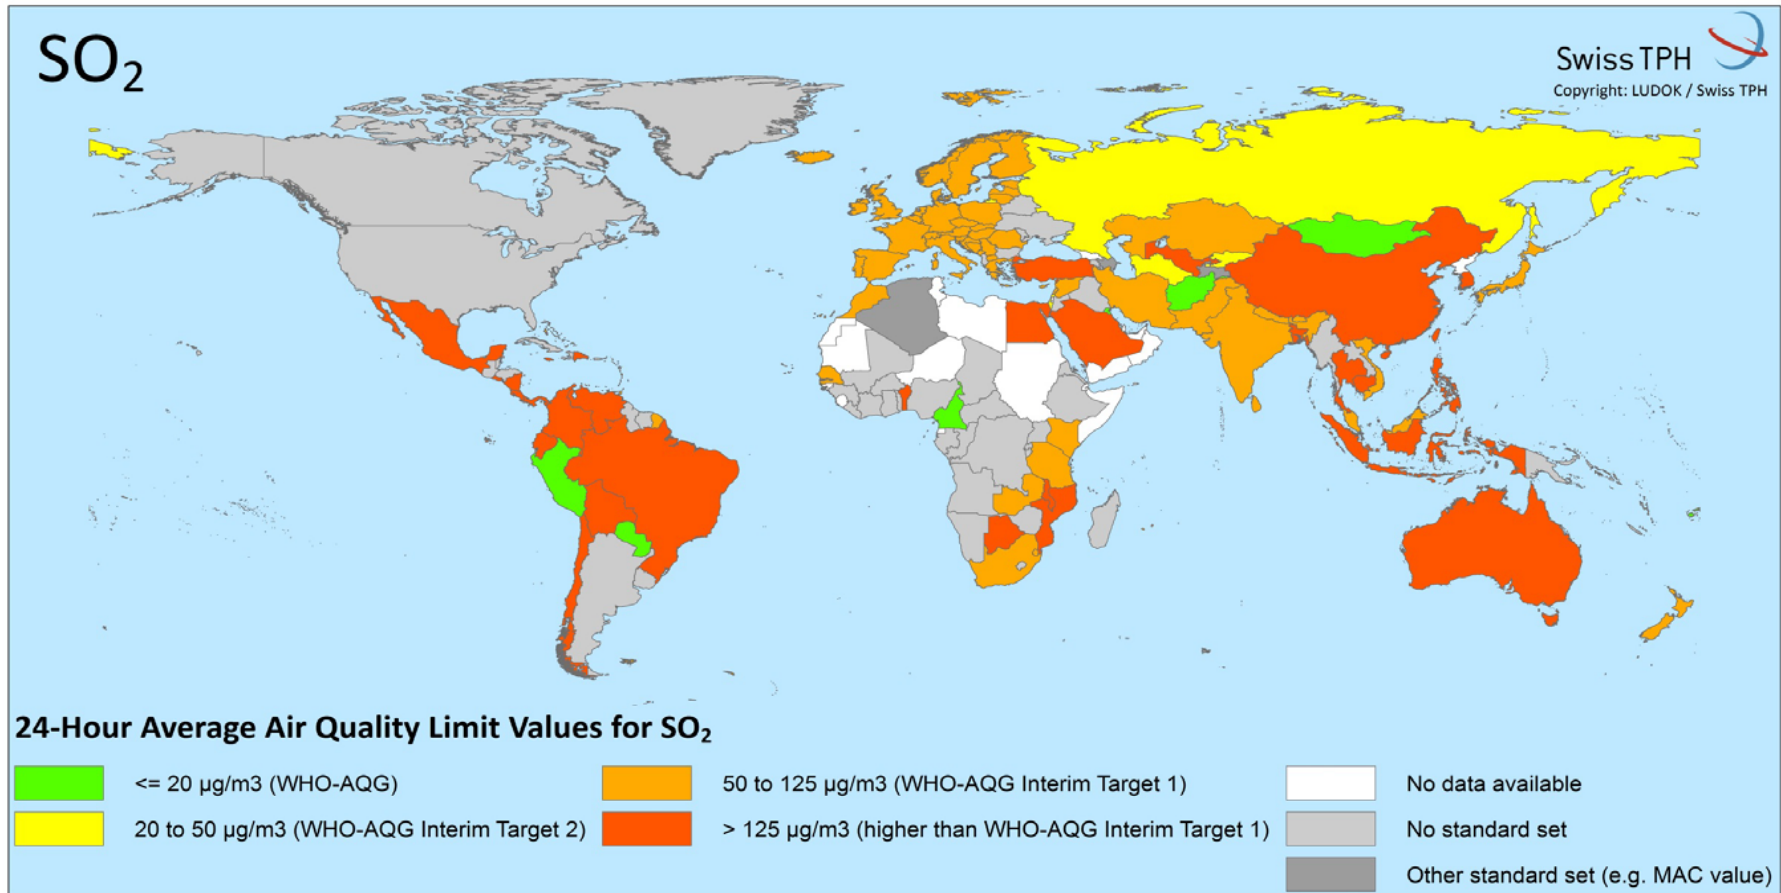

Online Resource 8. World map of national air quality standards for 1-hour average concentration of NO<sub>2</sub> in relation to WHO air quality guideline values (WHO-AQG) and interim targets.

(NO<sub>x</sub> Oxides of nitrogen: NO and NO<sub>2</sub>)

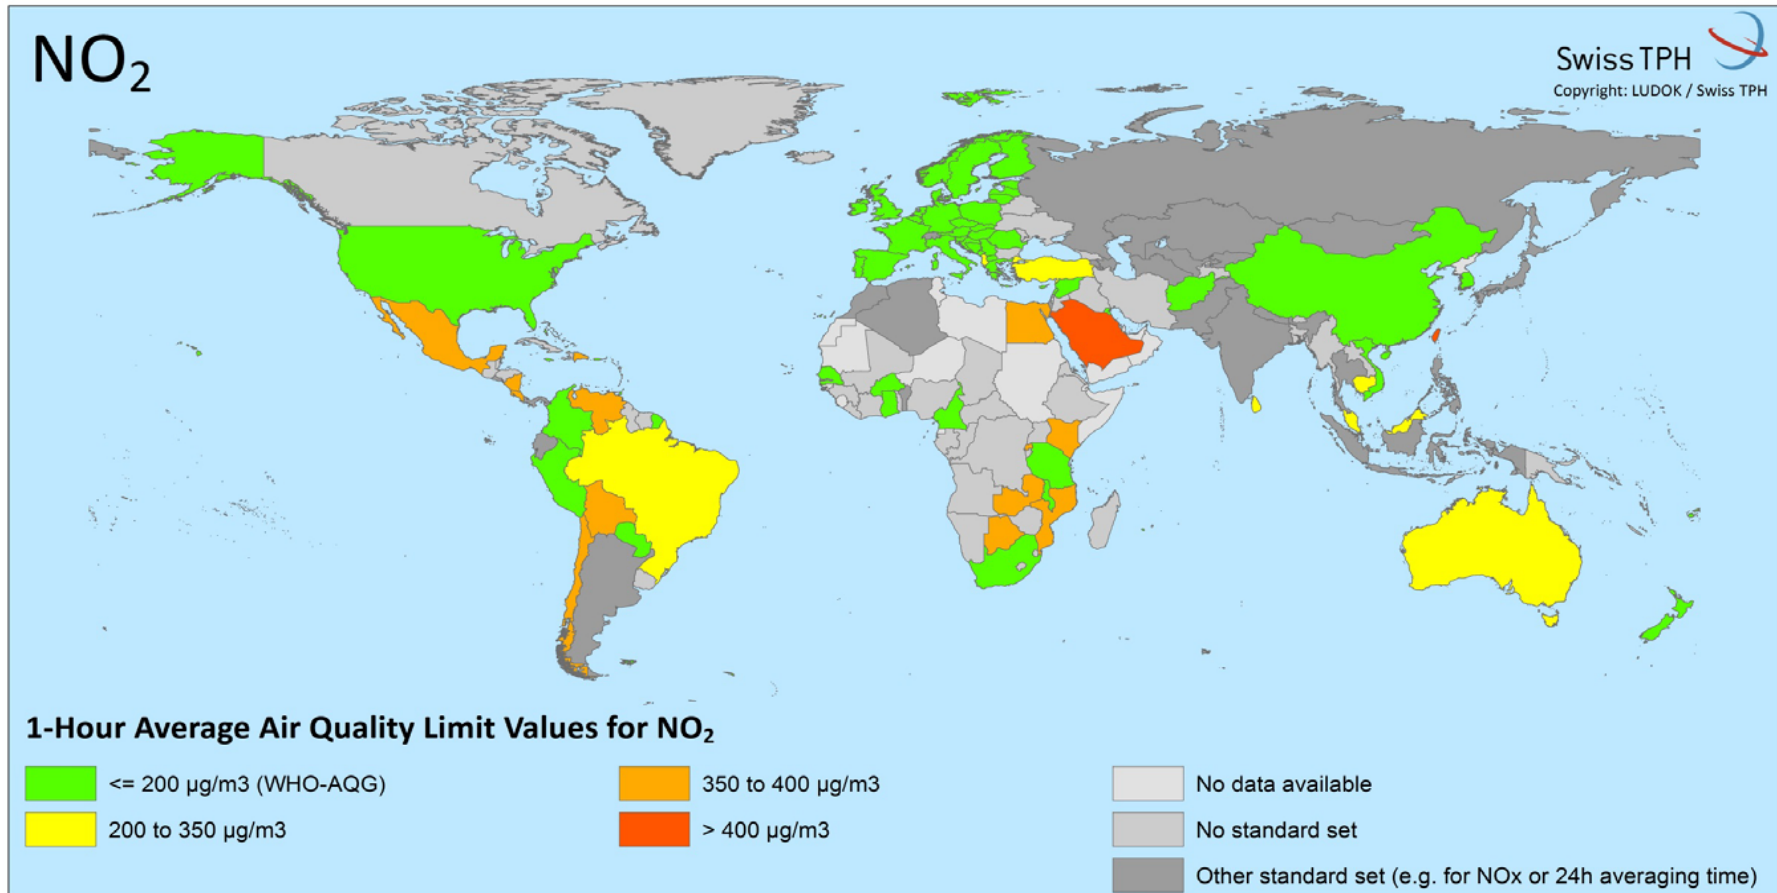

Online Resource 9. World map of national air quality standards for 8-hour maximum concentration of Ozone in relation to WHO air quality guideline values (WHO-AQG) and interim targets.

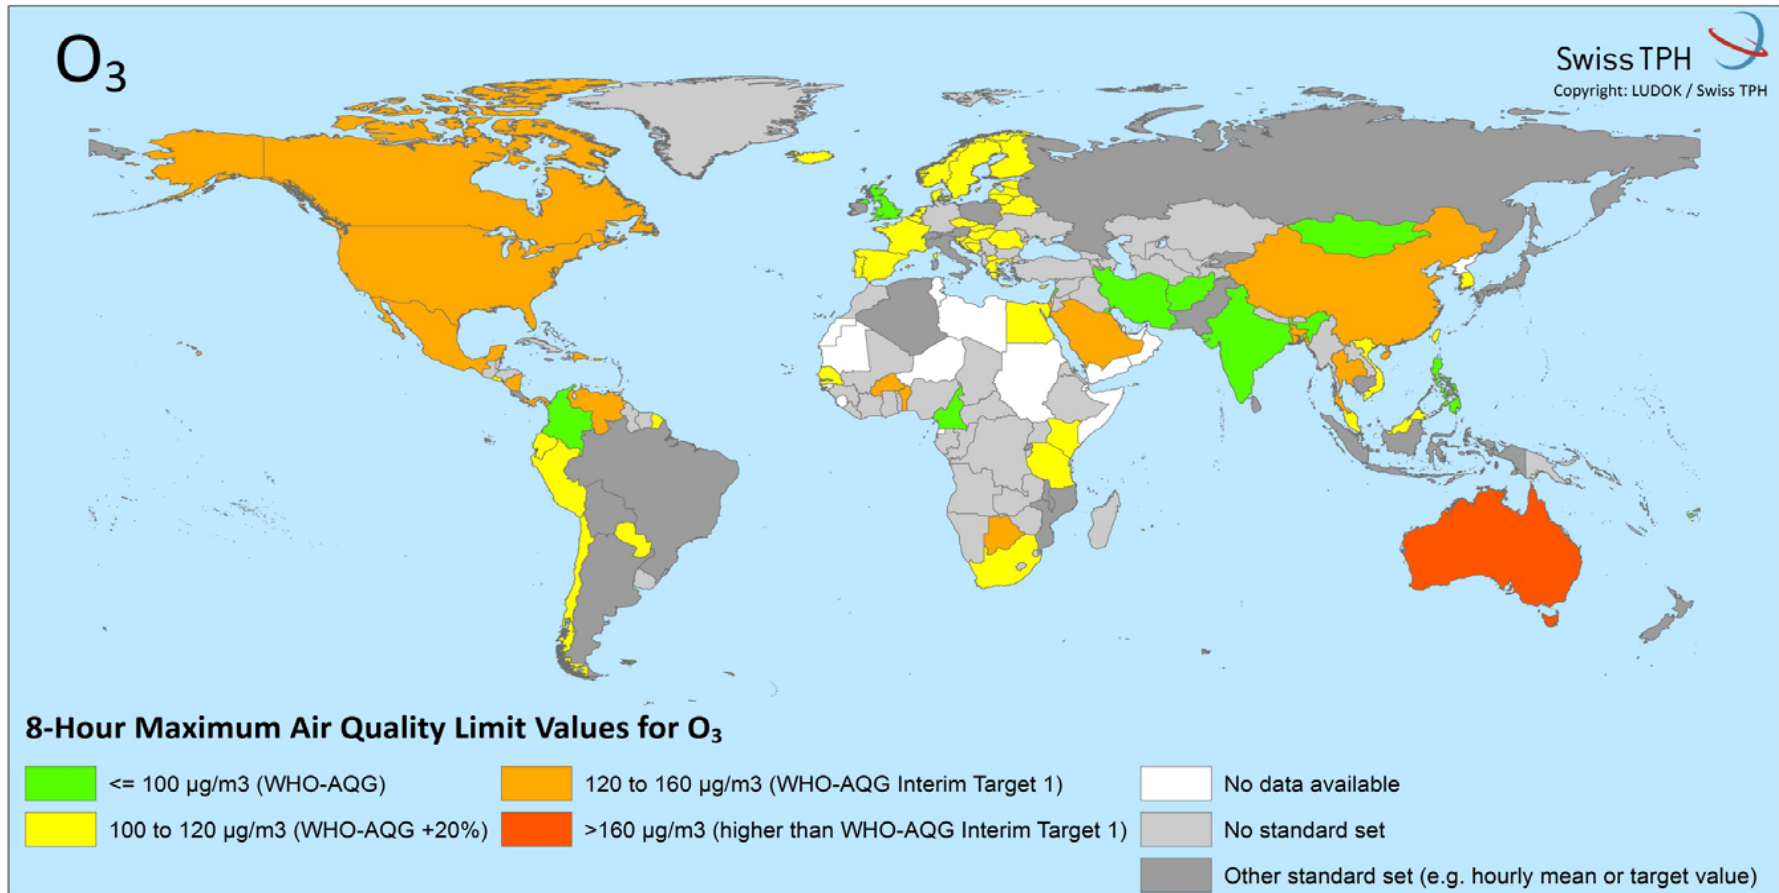

Online Resource 10. World map of national air quality standards for 8-hour average concentration of CO in relation to WHO air quality guideline values (WHO-AQG) and interim targets.

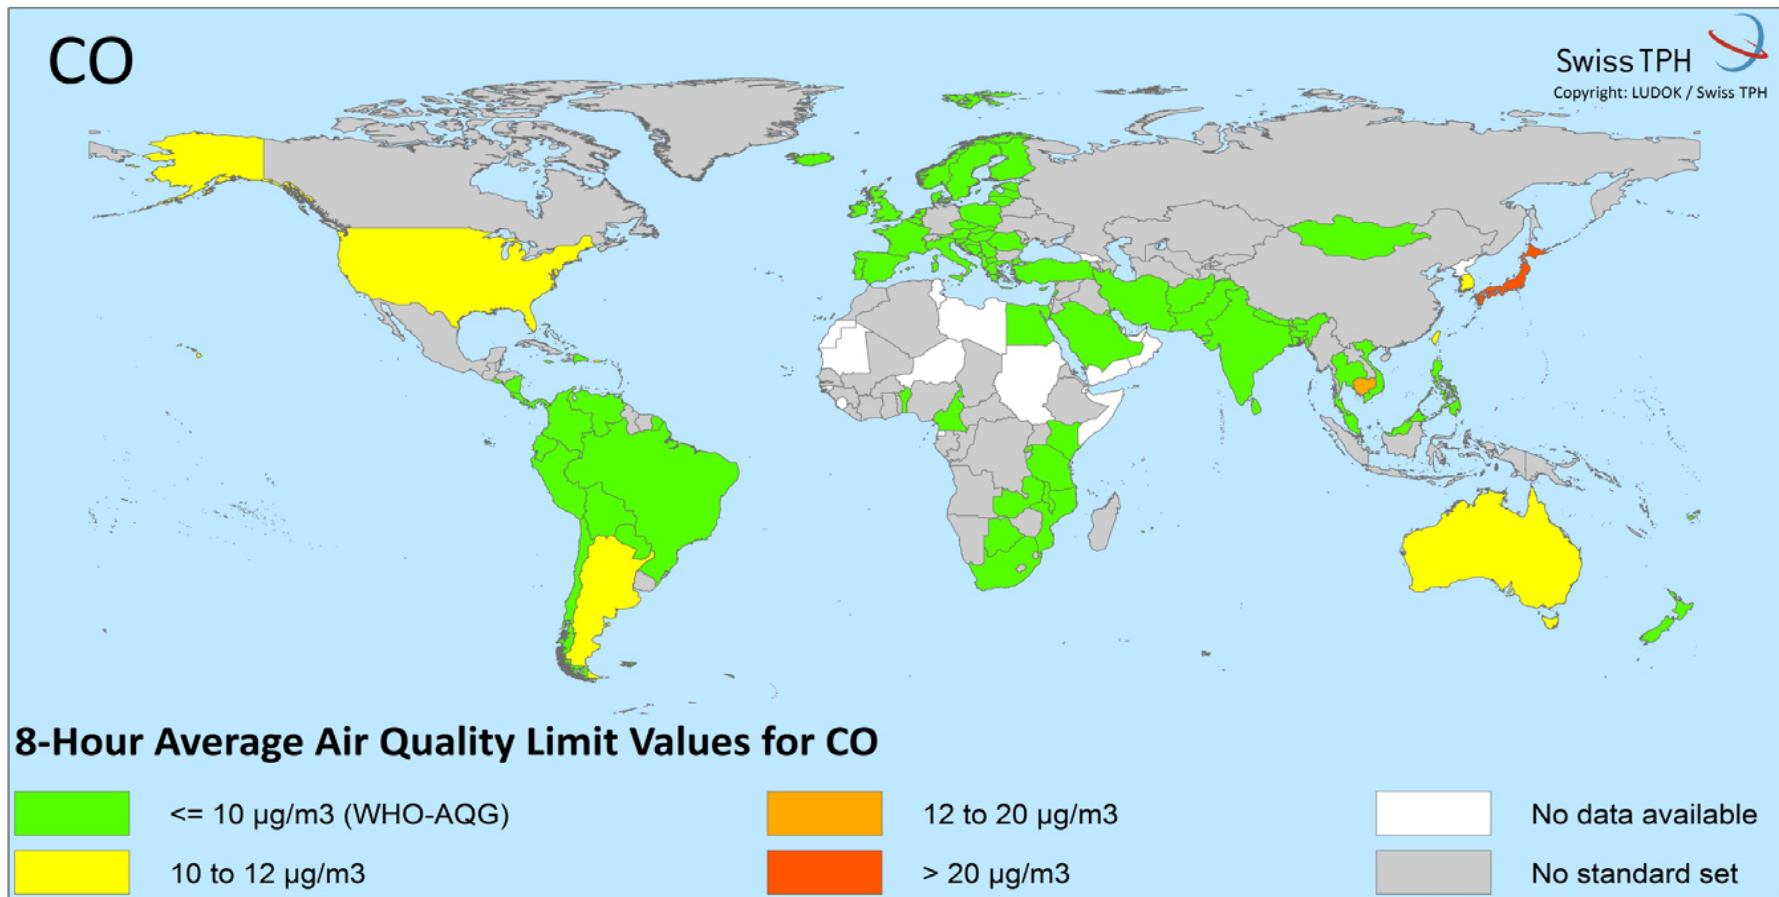

Online Resource 11. World map of national air quality standards for 1-hour average concentration of CO in relation to WHO air quality guideline values (WHO-AQG) and interim targets.

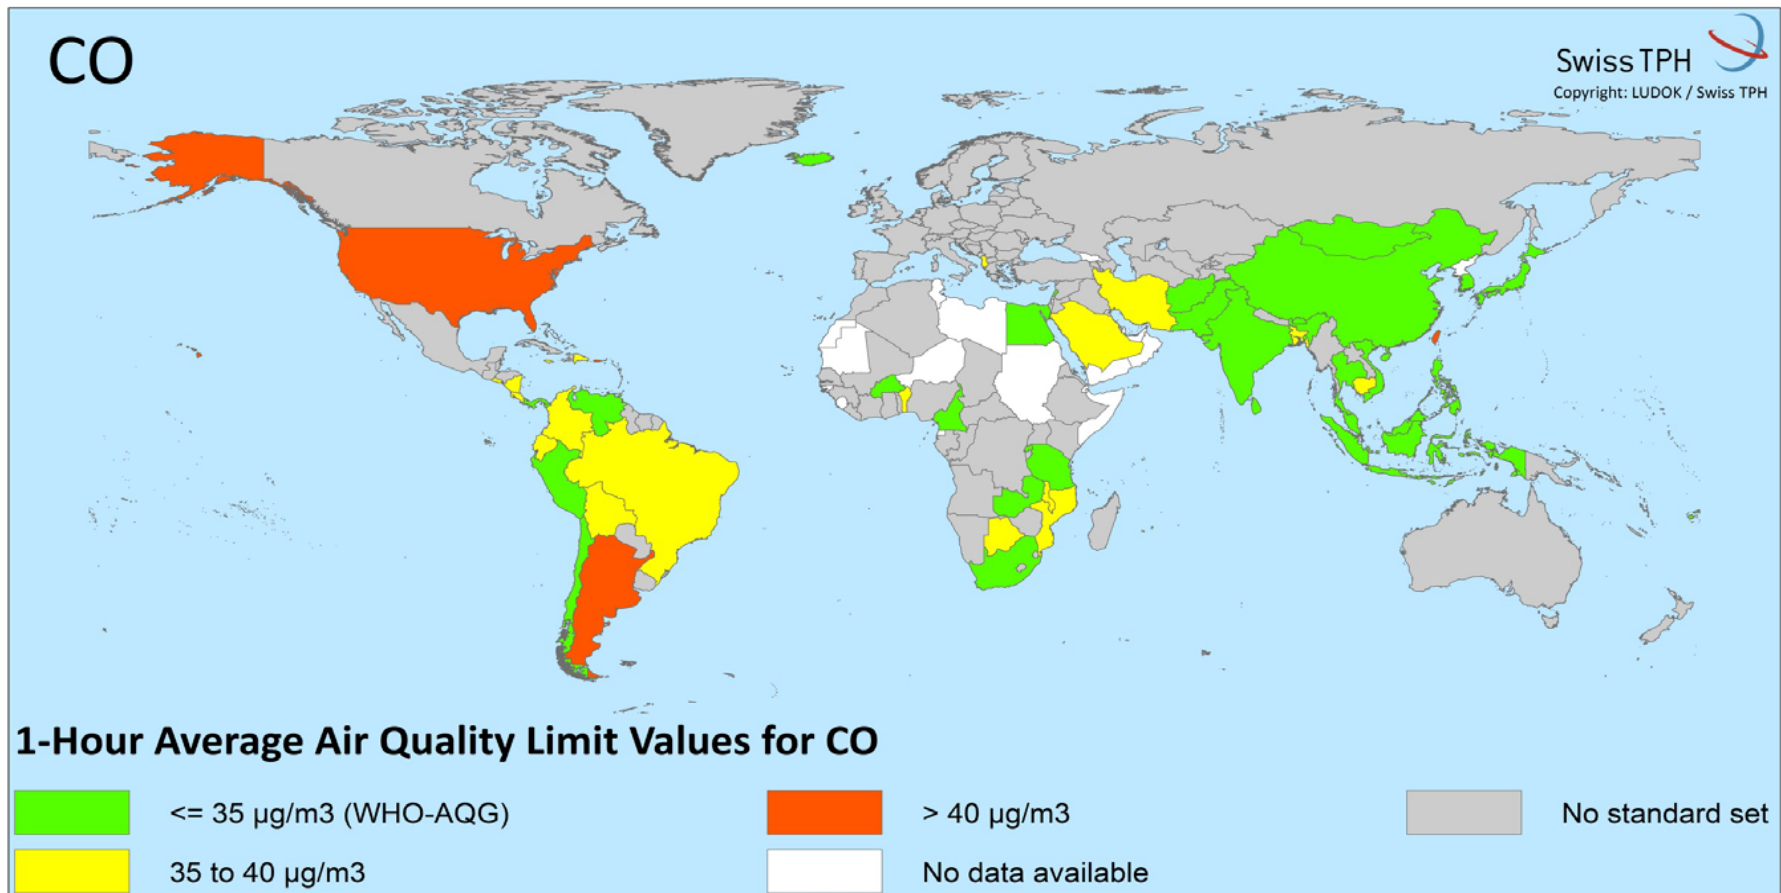

**Online Resource 12. Existing long-term ambient air quality standards for Particulate Matter by WHO Regions in countries recognized by the United Nations and actual annual mean measurement data from the WHO Global Urban Ambient Air Pollution Database.**

|                                | PM10<br>standard<br>annual<br>mean | Measure<br>ments:<br>Highest | Measure<br>ments:<br>Lowest | Mean if >3<br>stations | Year of<br>measurem<br>ent | Difference<br>highest vs<br>standard | Measure<br>ment sites<br>per<br>country |
|--------------------------------|------------------------------------|------------------------------|-----------------------------|------------------------|----------------------------|--------------------------------------|-----------------------------------------|
| <b>WHO REGIONS AQSS</b>        |                                    |                              |                             |                        |                            |                                      |                                         |
| <b>European Region</b>         |                                    |                              |                             |                        |                            |                                      |                                         |
| <b>EU Directive 2008/50/EC</b> | 40                                 |                              |                             |                        |                            |                                      |                                         |
| <i>Austria</i>                 | 40                                 | 27                           | 13                          | 21                     | 2013                       | -8                                   | 60                                      |
| <i>Belgium</i>                 | 40                                 | 31                           | 13                          | 24                     | 2013                       | -11                                  | 43                                      |
| <i>Croatia</i>                 | 40                                 | 37                           | 18                          | 31                     | 2013                       | -13                                  | 5                                       |
| <i>Cyprus</i>                  | 40                                 | 47                           | 26                          | 37                     | 2013                       | -10                                  | 5                                       |
| <i>Czech Republic</i>          | 40                                 | 45                           | 18                          | 28                     | 2013                       | -10                                  | 49                                      |
| <i>Denmark</i>                 | 40                                 | 27                           | 16                          | 22                     | 2013                       | -6                                   | 5                                       |
| <i>Estonia</i>                 | 40                                 | 17                           | 14                          | 16                     | 2013                       | -2                                   | 4                                       |
| <i>Finland</i>                 | 40                                 | 19                           | 4                           | 14                     | 2014                       | -9                                   | 24                                      |
| <i>France</i>                  | 40                                 | 36                           | 7                           | 19                     | 2014                       | -12                                  | 315                                     |
| <i>Germany</i>                 | 40                                 | 28                           | 8                           | 19                     | 2013                       | -11                                  | 161                                     |
| <i>Greece</i>                  | 40                                 | 42                           | 22                          | 34                     | 2013                       | -12                                  | 10                                      |
| <i>Hungary</i>                 | 40                                 | 35                           | 17                          | 26                     | 2013                       | -9                                   | 17                                      |
| <i>Ireland</i>                 | 40                                 | 22                           | 12                          | 16                     | 2013                       | -5                                   | 8                                       |
| <i>Italy</i>                   | 40                                 | 47                           | 6                           | 26                     | 2013                       | -20                                  | 236                                     |
| <i>Latvia</i>                  | 40                                 | 34                           | 17                          | 24                     | 2013                       | -7                                   | 4                                       |
| <i>Lithuania</i>               | 40                                 | 37                           | 26                          | 30                     | 2013                       | -4                                   | 9                                       |
| <i>Luxemburg</i>               | 40                                 | 22                           | 16                          | 20                     | 2013                       | -4                                   | 3                                       |
| <i>Malta</i>                   | 40                                 | 38                           | 23                          | 28                     | 2013                       | -6                                   | 4                                       |
| <i>The Netherlands</i>         | 40                                 | 28                           | 19                          | 23                     | 2013                       | -4                                   | 24                                      |
| <i>Poland</i>                  | 40                                 | 58                           | 10                          | 34                     | 2013                       | -23                                  | 154                                     |
| <i>Portugal</i>                | 40                                 | 21                           | 9                           | 15                     | 2014                       | -6                                   | 12                                      |
| <i>Romania</i>                 | 40                                 | 44                           | 12                          | 25                     | 2013                       | -13                                  | 42                                      |
| <i>Slovakia</i>                | 40                                 | 40                           | 22                          | 29                     | 2013                       | -8                                   | 21                                      |
| <i>Slovenia</i>                | 40                                 | 30                           | 20                          | 26                     | 2013                       | -6                                   | 13                                      |
| <i>Spain</i>                   | 40                                 | 33                           | 6                           | 18                     | 2013                       | -12                                  | 225                                     |
| <i>Sweden</i>                  | 40                                 | 29                           | 7                           | 20                     | 2013                       | -12                                  | 19                                      |
| <i>United Kingdom</i>          | 40                                 | 31                           | 12                          | 18                     | 2013                       | -6                                   | 51                                      |
| Albania                        | 50                                 | 32                           | 32                          | 32                     | 2013                       | 0                                    | 32                                      |
| Andorra                        | 40                                 | 18                           | 18                          |                        | 2014                       | 18                                   | 1                                       |
| Bosnia and Herzegovina         | 40                                 | 106                          | 50                          |                        | 2010                       | 50                                   | 2                                       |
| Iceland                        | 20                                 | 15                           | 8                           | 12                     | 2013                       | -3                                   | 3                                       |
| Israel                         | 50                                 | 57                           | 31                          | 44                     | 2014                       | -13                                  | 40                                      |
| Montenegro                     | 40                                 | 77                           | 26                          | 42                     | 2014                       | -16                                  | 5                                       |
| Norway                         | 25                                 | 28                           | 16                          | 20                     | 2013                       | -5                                   | 12                                      |
| Russian Federation             | 40                                 | 33                           | 33                          |                        | 2009                       | 33                                   | 1                                       |
| Serbia                         | 40                                 | 37                           | 31                          | 34                     | 2013                       | -3                                   | 3                                       |
| Switzerland                    | 20                                 | 23                           | 16                          | 20                     | 2013                       | -4                                   | 9                                       |
| oslav Republic of Macedonia    | 40                                 | 140                          | 51                          | 83                     | 2013                       | -32                                  | 4                                       |

|                                    |     |     |     |     |      |      |     |
|------------------------------------|-----|-----|-----|-----|------|------|-----|
| Turkey                             | 60  | 109 | 12  | 61  | 2012 | -49  | 81  |
| <b>Region of the Americas</b>      |     |     |     |     |      | 0    |     |
| Bolivia (Plurinational State of)   | 50  | 82  | 60  |     | 2014 | 60   | 2   |
| Brazil                             | 50  | 95  | 12  | 34  | 2014 | -22  | 45  |
| Chile                              | 50  | 75  | 12  | 46  | 2014 | -35  | 23  |
| Colombia                           | 50  | 52  | 18  | 40  | 2014 | -22  | 18  |
| Costa Rica                         | 50  | 47  | 20  | 29  | 2013 | -9   | 7   |
| Ecuador                            | 50  | 69  | 18  | 36  | 2012 | -17  | 9   |
| El Salvador                        | 50  | 77  | 77  |     | 2014 | 77   | 1   |
| Jamaica                            | 50  | 54  | 24  | 38  | 2012 | -14  | 6   |
| Mexico                             | 40  | 86  | 32  | 56  | 2011 | -24  | 9   |
| Panama                             | 50  | 31  | 31  |     | 2013 | 31   | 1   |
| Peru                               | 50  | 88  | 88  |     | 2013 | 88   | 1   |
| Venezuela (Bolivarian Republic of) | 50  | 47  | 47  |     | 2012 | 47   | 1   |
| <b>African Region</b>              |     |     |     |     |      | 0    |     |
| Cameroon                           | 20  | 141 | 65  | 104 | 2012 | -39  | 3   |
| Senegal                            | 80  | 141 | 141 |     | 2013 | 141  | 1   |
| South Africa                       | 50  | 119 | 24  | 54  | 2014 | -30  | 13  |
| United Republic of Tanzania        | 60  | 35  | 35  |     | 2011 | 35   | 1   |
| Afghanistan                        | 20  | 334 | 260 |     | 2009 | 260  | 2   |
| Iran (Islamic Republic of)         | 20  | 527 | 18  | 115 | 2010 | -97  | 25  |
| Jordan                             | 70  | 128 | 45  | 77  | 2015 | -32  | 4   |
| Kuwait                             | 90  | 212 | 63  | 139 | 2014 | -76  | 11  |
| Pakistan                           | 120 | 540 | 198 | 339 | 2011 | -141 | 5   |
| Saudi Arabia                       | 80  | 368 | 153 | 248 | 2014 | -95  | 7   |
| Bangladesh                         | 50  | 191 | 64  | 140 | 2014 | -77  | 8   |
| Bhutan                             | 60  | 78  | 78  |     | 2012 | 78   | 1   |
| India                              | 60  | 329 | 11  | 107 | 2012 | -96  | 122 |
| Sri Lanka                          | 50  | 64  | 64  |     | 2011 | 64   | 1   |
| Thailand                           | 50  | 57  | 23  | 45  | 2014 | -22  | 26  |
| <b>Western pacific</b>             |     |     |     |     |      | 0    |     |
| China                              | 50  | 305 | 16  | 84  | 2014 | -69  | 210 |
| Malaysia                           | 50  | 47  | 20  | 31  | 2014 | -11  | 6   |
| Mongolia                           | 50  | 165 | 165 |     | 2010 | 165  | 1   |
| Philippines                        | 60  | 84  | 21  | 52  | 2013 | -31  | 8   |
| Republic of Korea                  | 50  | 54  | 38  | 47  | 2014 | -9   | 16  |

**Reference:** WHO (2016a) WHO Global Urban Ambient Air Pollution Database (update 2016). WHO: Public health, environmental and social determinants of health (PHE).

[http://www.who.int/phe/health\\_topics/outdoorair/databases/cities/en/](http://www.who.int/phe/health_topics/outdoorair/databases/cities/en/). Accessed 13.7.2016 2016

**Online Resource 13. Comparison of national annual air quality standard set for PM10 to measured annual mean concentrations for the year 2013.**

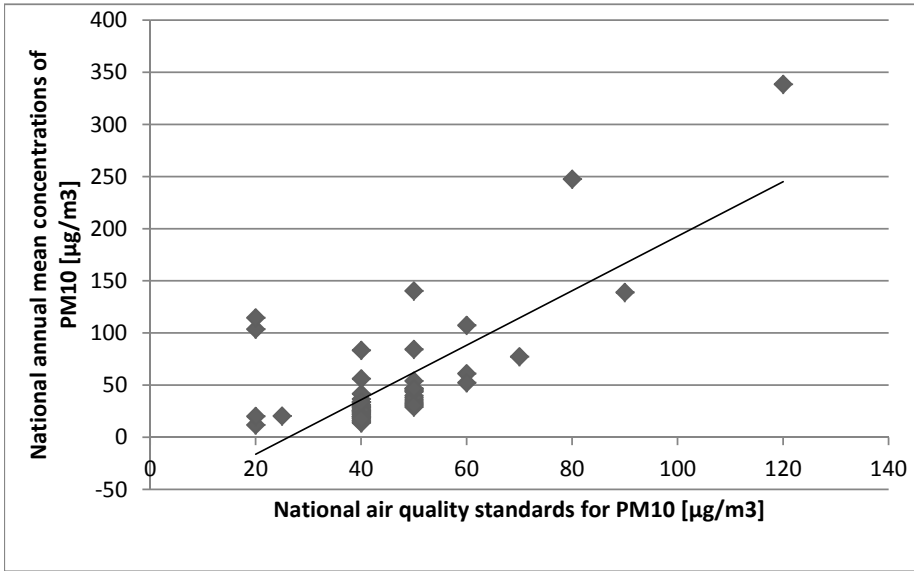

**Online Resource 14. Comparison of national annual air quality standard set for PM10 to highest measurement of annual concentration of PM10 in 2013.**

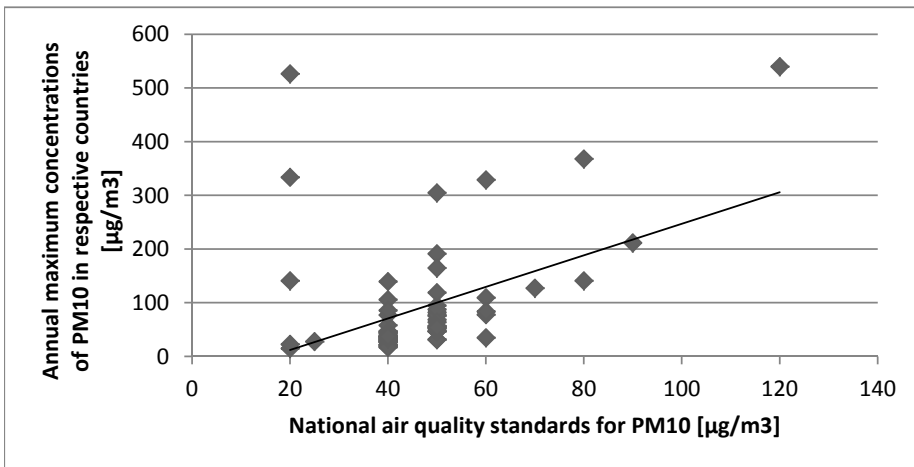

Supplement: 38_2017_952_MOESM1_ESM.pdf [file 38_2017_952_MOESM1_ESM.pdf]
